# Supplementary material for: Efficient synthesis of 2-substituted azoles: radical C–H alkylation of azoles with dicumyl peroxide, methylarenes and cycloalkanes under metal-free condition
Source: Royal Society of Chemistry journal article supplement (doi:10.1039/c7qo00396j), 2017-01-01

# **Efficient Synthesis of 2-Substituted Azoles: Radical C–H Alkylation of Azoles with Dicumyl Peroxide, Methylarenes and Cyclohexane under Metal-free Condition**

Ze-lin Li <sup>a</sup>, Li-kun Jin <sup>a</sup>, and Chun Cai <sup>\*a</sup>

<sup>a</sup> Chemical Engineering College, Nanjing University of Science and Technology, Nanjing 210094, People's Republic of China

Fax: (+86)-25-8431-5030; phone: (+86)-25-8431-5514; e-mail: c.cai@mail.njust.edu.cn

|                                 |           |
|---------------------------------|-----------|
| <b>1. General information</b>   | <b>2</b>  |
| <b>2. General procedure</b>     | <b>2</b>  |
| <b>3. Characterization data</b> | <b>3</b>  |
| <b>4. NMR spectra</b>           | <b>10</b> |

## 1. General information

All compounds are characterized by  $^1\text{H}$  NMR,  $^{13}\text{C}$  NMR and MS. Analytical thin-layer chromatography is performed on glass plates precoated with silica gel impregnated with a fluorescent indicator (254 nm), and the plates are visualized by exposure to ultraviolet light.  $^1\text{H}$  NMR and  $^{13}\text{C}$  NMR spectra are recorded on an AVANCE 500 Bruker spectrometer operating at 500 MHz and 125 MHz in  $\text{CDCl}_3$ , respectively, and chemical shifts are reported in ppm. GC analyses are performed on an Agilent 7890A instrument (Column: Agilent 19091J-413:30 m  $\times$  320  $\mu\text{m}$   $\times$  0.25  $\mu\text{m}$ , H, FID detection). GC-MS data was recorded on a 5975C Mass Selective Detector, coupled with a 7890A Gas Chromatograph (Agilent Technologies).

## 2. General procedure

**General procedure for the preparation of substituted benzothiazole :** A 50 mL Schlenk tube was charged with 2-aminobenzothiazole derivative (6.5 mmol) and 10 mL of THF, and then isoamyl nitrite (14.3 mmol) was added slowly into the solution. The resultant mixture was refluxed for 30 minutes, and poured into ice-water, and the resultant aqueous mixture was extracted with ethyl acetate (3 $\times$ 30 mL). The organic extracts were combined and washed with brine, dried over  $\text{MgSO}_4$ , filtered, concentrated in vacuum and purified by column chromatography, giving the desired benzothiazoles in similar yields with the reported procedure.

**General procedure for the synthesis of 2-benylation azoles :** To a mixture of benzothiazole (0.5 mmol) **1** and toluene derivative or cyclohexane **2** (2 mL) in a reaction tube was added DTBP (2.0 equiv). The reaction mixture was stirred for 24 h at 120  $^\circ\text{C}$  in air. The reaction mixture was extracted with ethyl acetate (15 mL  $\times$  3). The combined organic layers were washed with brine, dried over  $\text{MgSO}_4$ , and concentrated in vacuo. The residue was purified by column chromatography on silica gel to afford the desired products **3** or **4**.

**General procedure for the synthesis of 2-methylation azoles :** To a mixture of benzothiazole (0.5 mmol) **1** and HOAc (2 mL) in a reaction tube was added DCP (2.0 equiv). The reaction mixture was stirred for 12 h at 120  $^\circ\text{C}$  in air. The reaction mixture was extracted with ethyl acetate (15 mL  $\times$  3). The combined organic layers were washed with brine, dried over  $\text{MgSO}_4$ , and concentrated in vacuo. The residue was purified by column chromatography on silica gel to afford the desired products **5**.

### 3.Characterization data

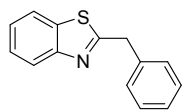

Formula: C<sub>14</sub>H<sub>11</sub>NS  
Mass:225

**2-benzylbenzo[d]thiazole(3a):** The crude product was purified by column chromatography on silica gel (petroleum ether/ethyl acetate = 4:1) to give **3a** as white solid (84.4mg, 75%). <sup>1</sup>H NMR (500 MHz, Chloroform-*d*) δ 7.95 (d, *J* = 8.1 Hz, 1H), 7.73 (d, *J* = 7.9 Hz, 1H), 7.39 (t, *J* = 7.7 Hz, 1H), 7.34 – 7.23 (m, 6H), 4.39 (s, 2H). <sup>13</sup>C NMR (126 MHz, Chloroform-*d*) δ 170.2, 152.3, 136.2, 134.7, 128.2, 127.9, 126.4, 125.0, 123.9, 121.8, 120.6, 39.7. GC-MS (EI) *m/z*: 225.

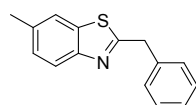

Formula: C<sub>15</sub>H<sub>13</sub>NS  
Mass: 239

**2-benzyl-6-methylbenzo[d]thiazole (3b):** The crude product was purified by column chromatography on silica gel (petroleum ether/ethyl acetate = 9:1) to give **3b** as white solid (71.7 mg, 60%). <sup>1</sup>H NMR (500 MHz, Chloroform-*d*) δ 7.79 (d, *J* = 8.3 Hz, 1H), 7.65 (d, *J* = 8.5 Hz, 1H), 7.49 (s, 1H), 7.29 – 7.27 (m, 3H), 7.19 – 7.17 (m, 1H), 7.11 – 7.09 (m, 1H), 4.34 (s, 2H), 2.38 (s, 3H). <sup>13</sup>C NMR (126 MHz, Chloroform-*d*) δ 169.0, 150.4, 134.9, 134.1, 129.9, 128.2, 127.9, 127.3, 126.5, 121.3, 120.3, 39.6, 20.5. GC-MS (EI) *m/z*: 239.

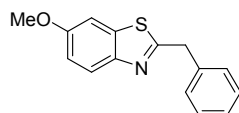

Formula: C<sub>15</sub>H<sub>13</sub>NOS  
Mass: 255

**2-benzyl-6-methoxybenzo[d]thiazole (3c):** The crude product was purified by column chromatography on silica gel (petroleum ether/ethyl acetate = 9:1) to give **3c** as white solid (88.0 mg, 69%). <sup>1</sup>H NMR (500 MHz, Chloroform-*d*) δ 7.78 (d, *J* = 8.9 Hz, 1H), 7.29 – 7.26 (m, 3H), 7.18 – 7.18 (m, 3H), 6.97 (d, *J* = 6.4 Hz, 1H), 4.31 (s, 2H), 3.77 (s, 3H). <sup>13</sup>C NMR (126 MHz, Chloroform-*d*) δ 167.5, 151.6, 136.0, 128.2, 127.9, 126.3, 124.6, 123.1, 122.3, 114.1, 103.3, 54.8, 39.6. GC-MS (EI) *m/z*: 255.

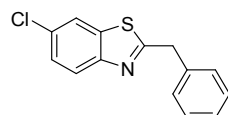

Formula: C<sub>14</sub>H<sub>10</sub>ClNO  
Mass:259

**2-benzyl-6-chlorobenzo[d]thiazole (3d):** The crude product was purified by column chromatography on silica gel (petroleum ether/ethyl acetate = 5:1) to give **3d** as white solid (97.1 mg, 75%). <sup>1</sup>H NMR (500 MHz, Chloroform-*d*) δ 7.81 (d, *J* = 8.7 Hz, 1H), 7.68 (d, *J* = 2.0 Hz, 1H), 7.34 – 7.22 (m, 6H), 4.34 (s, 2H). <sup>13</sup>C NMR (126 MHz, Chloroform-*d*) δ 170.8, 150.9, 135.9, 129.7, 128.2, 128.0, 127.6, 126.5, 125.8, 122.6, 120.2, 39.6. GC-MS (EI) *m/z*: 259.

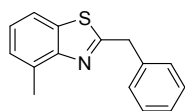

Formula: C<sub>15</sub>H<sub>13</sub>NS

Mass: 239

**2-benzyl-4-methylbenzo[d]thiazole (3e):** The crude product was purified by column chromatography on silica gel (petroleum ether/ethyl acetate = 9:1) to give **3e** as white solid (63.3mg, 53%). <sup>1</sup>H NMR (500 MHz, Chloroform-*d*) δ 7.53 (d, *J* = 7.3 Hz, 1H), 7.32 – 7.24 (m, 4H), 7.18 – 7.16 (m, 3H), 4.38 (s, 2H), 2.68 (s, 3H). <sup>13</sup>C NMR (126 MHz, Chloroform-*d*) δ 168.5, 148.7, 128.2, 127.8, 127.3, 126.8, 126.3, 125.6, 124.6, 123.7, 117.9, 39.8, 17.6. GC-MS (EI) *m/z*: 239.

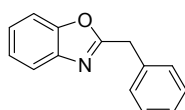

Formula: C<sub>14</sub>H<sub>11</sub>NO

Mass: 209

**2-benzylbenzo[d]oxazole(3f):** The crude product was purified by column chromatography on silica gel (petroleum ether/ethyl acetate = 4:1) to give **3f** as yellow solid (71.1mg, 68%). <sup>1</sup>H NMR (500 MHz, Chloroform-*d*) δ 7.63 – 7.58 (m, 1H), 7.40 – 7.17 (m, 8H), 4.20 (s, 2H). <sup>13</sup>C NMR (126 MHz, Chloroform-*d*) δ 164.2, 150.1, 140.4, 133.8, 128.0, 127.9, 126.4, 123.7, 123.2, 118.9, 109.5, 34.3. GC-MS (EI) *m/z*: 209.

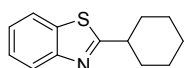

Formula: C<sub>13</sub>H<sub>15</sub>NS

Mass: 217

**2-cyclohexylbenzo[d]thiazole (3g):** The crude product was purified by column chromatography on silica gel (petroleum ether/ethyl acetate = 4:1) to give **3g** as yellow solid (90.1mg, 83%). <sup>1</sup>H NMR (500 MHz, Chloroform-*d*) δ 7.97 (d, *J* = 8.1 Hz, 1H), 7.84 (d, *J* = 8.0 Hz, 1H), 7.44 (t, *J* = 8.2 Hz, 1H), 7.33 (t, *J* = 7.6 Hz, 1H), 3.11 (tt, *J* = 11.7, 3.6 Hz, 1H), 2.21 (d, *J* = 15.5 Hz, 2H), 1.92 – 1.86 (m, 2H), 1.77 (d, *J* = 14.1 Hz, 1H), 1.69 – 1.60 (m, 2H), 1.50 – 1.40 (m, 2H), 1.37 – 1.28 (m, 1H). <sup>13</sup>C NMR (126 MHz, DMSO-*d*<sub>6</sub>) δ 177.13, 153.24, 134.62, 126.50, 125.25, 122.80, 122.61, 42.83, 33.32, 25.94, 25.68. GC-MS (EI) *m/z*: 217.

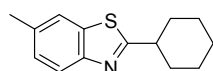

Formula: C<sub>14</sub>H<sub>17</sub>NS

Mass: 231

**2-cyclohexyl-6-methylbenzo[d]thiazole(3h):** The crude product was purified by column chromatography on silica gel (petroleum ether/ethyl acetate = 4:1) to give **3h** as yellow solid (94.7mg, 82%). <sup>1</sup>H NMR (500 MHz, Chloroform-*d*) δ 7.76 (d, *J* = 8.3 Hz, 1H), 7.54 (s, 1H), 7.16 (d, *J* = 7.4 Hz, 1H), 3.04 – 2.94 (m, 1H), 2.38 (s, 3H), 2.11 (d, *J* = 15.5 Hz, 2H), 1.80 (d, *J* = 13.3 Hz, 2H), 1.70 – 1.50 (m, 3H), 1.42 – 1.20 (m, 3H). <sup>13</sup>C NMR (126 MHz, Chloroform-*d*) δ 150.2, 133.7, 133.5, 126.3, 121.1, 120.4, 42.4, 32.5, 25.1, 24.9, 20.5. GC-MS (EI) *m/z*: 231.

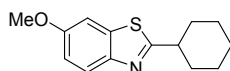

Formula: C<sub>14</sub>H<sub>17</sub>NOS

Mass: 247

**2-cyclohexyl-6-methoxybenzo[d]thiazole(3i):** The crude product was purified by

column chromatography on silica gel (petroleum ether/ethyl acetate =4:1) to give **3i** as yellow solid (106.2mg, 86%). <sup>1</sup>H NMR (500 MHz, Chloroform-*d*) δ 7.76 (d, *J* = 8.9 Hz, 1H), 7.22 (d, *J* = 2.5 Hz, 1H), 6.95 (dd, *J* = 8.9, 2.5 Hz, 1H), 3.77 (s, 3H), 3.07 – 2.86 (m, 1H), 2.10 (d, *J* = 15.3 Hz, 2H), 1.79 (d, *J* = 13.3 Hz, 2H), 1.70 – 1.48 (m, 3H), 1.39 – 1.18 (m, 3H). <sup>13</sup>C NMR (126 MHz, Chloroform-*d*) δ 174.1, 156.3, 146.6, 134.8, 122.0, 113.9, 103.3, 54.8, 42.4, 32.5, 25.1, 24.9. GC-MS (EI) *m/z*: 247.

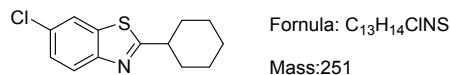

**6-chloro-2-cyclohexylbenzo[d]thiazole (3j)**: The crude product was purified by column chromatography on silica gel (petroleum ether/ethyl acetate =5:1) to give **3j** as yellow solid (110.4mg, 88%). <sup>1</sup>H NMR (500 MHz, Chloroform-*d*) δ 7.77 (d, *J* = 8.7 Hz, 1H), 7.72 (d, *J* = 2.0 Hz, 1H), 7.31 (dd, *J* = 8.7, 2.1 Hz, 1H), 3.05 – 2.93 (m, 1H), 2.13 – 2.07 (d, *J* = 15.5 Hz, 2H), 1.80 (d, *J* = 13.3 Hz, 2H), 1.70 – 1.51 (m, 3H), 1.38 – 1.19 (m, 3H). <sup>13</sup>C NMR (126 MHz, Chloroform-*d*) δ 177.1, 150.7, 134.8, 129.4, 125.6, 122.3, 120.2, 42.4, 32.4, 25.1, 24.8. GC-MS (EI) *m/z*: 251.

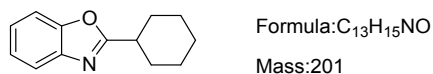

**2-cyclohexylbenzo[d]oxazole (3k)**: The crude product was purified by column chromatography on silica gel (petroleum ether/ethyl acetate =5:1) to give **3k** as yellow solid (78.4mg, 78%). <sup>1</sup>H NMR (500 MHz, Chloroform-*d*) δ 7.65 – 7.56 (m, 1H), 7.44 – 7.37 (m, 1H), 7.23 – 7.15 (m, 2H), 2.98 – 2.78 (m, 1H), 2.10 (d, *J* = 16.2 Hz, 2H), 1.80 (d, *J* = 13.3 Hz, 2H), 1.71 – 1.58 (m, 3H), 1.40 – 1.22 (m, 3H). <sup>13</sup>C NMR (126 MHz, Chloroform-*d*) δ 169.5, 149.6, 140.3, 123.4, 123.0, 118.6, 109.3, 37.0, 29.5, 24.8, 24.7. GC-MS (EI) *m/z*: 201.

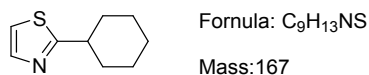

**2-cyclohexylthiazole (3l)**: The crude product was purified by column chromatography on silica gel (petroleum ether/ethyl acetate =5:1) to give **3l** as yellow solid (48.4mg, 58%). <sup>1</sup>H NMR (500 MHz, Chloroform-*d*) δ 7.60 (d, *J* = 3.3 Hz, 1H), 7.10 (d, *J* = 3.3 Hz, 1H), 2.97 – 2.90 (m, 1H), 2.07 (d, *J* = 12.9 Hz, 2H), 1.77 (d, *J* = 13.2 Hz, 2H), 1.68 – 1.64 (m, 1H), 1.50 – 1.41 (m, 2H), 1.38 – 1.31 (m, 3H), 1.24 – 1.20 (m, 2H). <sup>13</sup>C NMR (126 MHz, Chloroform-*d*) δ 176.2, 140.9, 116.6, 41.5, 32.8, 25.1, 24.9. GC-MS (EI) *m/z*: 167.

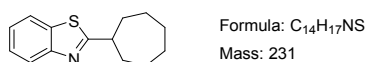

**2-cycloheptylbenzo[d]thiazole (3m)**: The crude product was purified by column chromatography on silica gel (petroleum ether/ethyl acetate =5:1) to give **3m** as yellow solid (88.9mg, 77%). <sup>1</sup>H NMR (500 MHz, Chloroform-*d*) δ 7.98 (d, *J* = 7.8 Hz, 1H), 7.85 (d, *J* = 7.6 Hz, 1H), 7.49 – 7.40 (m, 1H), 7.38 – 7.29 (m, 1H), 3.38 – 3.22 (m, 1H), 2.31 – 2.16 (m, 2H), 1.95 – 1.81 (m, 4H), 1.74 – 1.60 (m, 6H). <sup>13</sup>C NMR

(126 MHz, Chloroform-*d*)  $\delta$  177.8, 152.0, 133.7, 124.8, 123.5, 121.6, 120.5, 44.6, 34.4, 27.1, 25.6. GC-MS (EI) *m/z*: 231.

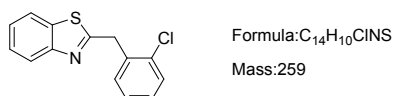

**2-(2-chlorobenzyl)benzo[d]thiazole(4a)**: The crude product was purified by column chromatography on silica gel (petroleum ether/ethyl acetate =4:1) to give **4a** as white solid (84.2mg, 65%). <sup>1</sup>H NMR (500 MHz, Chloroform-*d*)  $\delta$  7.93 (d, *J* = 8.2 Hz, 1H), 7.72 (d, *J* = 8.0 Hz, 1H), 7.41 – 7.32 (m, 3H), 7.27 (t, *J* = 7.6 Hz, 1H), 7.21 – 7.17 (m, 2H), 4.52 (s, 2H). <sup>13</sup>C NMR (126 MHz, Chloroform-*d*)  $\delta$  168.7, 152.3, 134.6, 134.1, 130.4, 128.9, 128.0, 127.1, 126.3, 125.0, 123.9, 121.8, 120.6, 37.2. GC-MS (EI) *m/z*: 259.

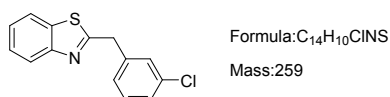

**2-(3-chlorobenzyl)benzo[d]thiazole(4b)**: The crude product was purified by column chromatography on silica gel (petroleum ether/ethyl acetate =4:1) to give **4b** as white solid (88.1mg, 68%). <sup>1</sup>H NMR (500 MHz, Chloroform-*d*)  $\delta$  7.94 (d, *J* = 8.2 Hz, 1H), 7.74 (d, *J* = 7.9 Hz, 1H), 7.40 (t, *J* = 8.2 Hz, 1H), 7.31 – 7.26 (m, 2H), 7.22 – 7.17 (m, 3H), 4.34 (s, 2H). <sup>13</sup>C NMR (126 MHz, Chloroform-*d*)  $\delta$  168.8, 152.3, 138.1, 134.7, 133.7, 129.1, 128.3, 126.6, 126.3, 125.2, 124.1, 121.9, 120.6, 39.2. GC-MS (EI) *m/z*: 259.

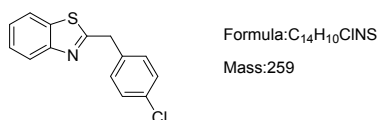

**2-(4-chlorobenzyl)benzo[d]thiazole(4c)**: The crude product was purified by column chromatography on silica gel (petroleum ether/ethyl acetate =4:1) to give **4c** as white solid (98.4mg, 76%). <sup>1</sup>H NMR (500 MHz, Chloroform-*d*)  $\delta$  7.92 (d, *J* = 8.2 Hz, 1H), 7.73 (d, *J* = 8.0 Hz, 1H), 7.39 (t, *J* = 7.7 Hz, 1H), 7.29 (t, *J* = 4.0 Hz, 1H), 7.27 – 7.20 (m, 4H), 4.34 (s, 2H). <sup>13</sup>C NMR (126 MHz, Chloroform-*d*)  $\delta$  169.3, 152.3, 134.6, 132.3, 129.5, 128.1, 127.5, 125.1, 124.0, 121.9, 120.6, 38.9. GC-MS (EI) *m/z*: 259.

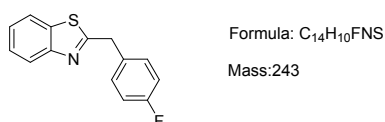

**2-(4-fluorobenzyl)benzo[d]thiazole(4d)**: The crude product was purified by column chromatography on silica gel (petroleum ether/ethyl acetate =4:1) to give **4d** as white solid (87.5mg, 72%). <sup>1</sup>H NMR (500 MHz, Chloroform-*d*)  $\delta$  7.93 (d, *J* = 8.2 Hz, 1H), 7.73 (d, *J* = 8.0 Hz, 1H), 7.39 (t, *J* = 8.1 Hz, 1H), 7.30 – 7.24 (m, 3H), 6.99 – 6.94 (m, 2H), 4.34 (s, 2H). <sup>13</sup>C NMR (126 MHz, Chloroform-*d*)  $\delta$  189.2, 169.8, 160.2, 134.6, 131.9, 129.7, 125.1, 124.0, 121.9, 120.6, 114.7, 38.8. GC-MS (EI) *m/z*: 243.

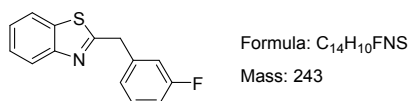

**2-(3-fluorobenzyl)benzo[d]thiazole(4e):** The crude product was purified by column chromatography on silica gel (petroleum ether/ethyl acetate =4:1) to give **4e** as white solid (82.6mg, 68%). <sup>1</sup>H NMR (500 MHz, Chloroform-*d*) δ 7.94 (d, *J* = 8.2 Hz, 1H), 7.74 (d, *J* = 8.0 Hz, 1H), 7.38 (t, *J* = 7.5 Hz, 1H), 7.32 – 7.22 (m, 2H), 7.08 (d, *J* = 7.6 Hz, 1H), 7.01 (d, *J* = 9.5 Hz, 1H), 6.92 (t, *J* = 9.6 Hz, 1H), 4.36 (s, 2H). <sup>13</sup>C NMR (126 MHz, Chloroform-*d*) δ 169.0, 161.0, 152.2, 138.5, 135.0, 129.4, 128.4, 125.1, 123.8, 121.9, 120.6, 115.3, 113.3, 39.2. GC-MS (EI) *m/z*: 243.

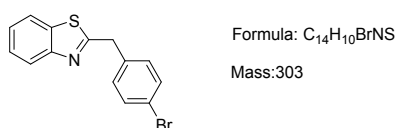

**2-(4-bromobenzyl)benzo[d]thiazole(4f):** The crude product was purified by column chromatography on silica gel (petroleum ether/ethyl acetate =4:1) to give **4f** as white solid (106.1mg, 70%). <sup>1</sup>H NMR (500 MHz, Chloroform-*d*) δ 7.92 (d, *J* = 8.2 Hz, 1H), 7.74 (d, *J* = 8.0 Hz, 1H), 7.42 – 7.37 (m, 3H), 7.28 (t, *J* = 7.3 Hz, 1H), 7.19 – 7.17 (m, 2H), 4.32 (s, 2H). <sup>13</sup>C NMR (126 MHz, Chloroform-*d*) δ 169.1, 152.3, 135.2, 134.6, 131.0, 129.9, 125.1, 124.0, 121.9, 120.4, 39.0. GC-MS (EI) *m/z*: 303.

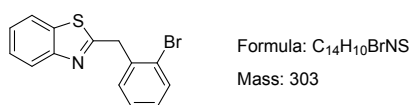

**2-(2-bromobenzyl)benzo[d]thiazole (4g):** The crude product was purified by column chromatography on silica gel (petroleum ether/ethyl acetate =4:1) to give **4g** as white solid (93.9mg, 62%). <sup>1</sup>H NMR (500 MHz, Chloroform-*d*) δ 7.94 (d, *J* = 8.1 Hz, 1H), 7.73 (d, *J* = 8.0 Hz, 1H), 7.55 (d, *J* = 8.0 Hz, 1H), 7.41 – 7.33 (m, 2H), 7.30 – 7.22 (m, 2H), 7.11 (t, *J* = 7.7 Hz, 1H), 4.53 (s, 2H). <sup>13</sup>C NMR (126 MHz, Chloroform-*d*) δ 168.8, 152.3, 135.9, 134.6, 132.2, 130.5, 128.2, 126.9, 125.0, 123.9, 122.1, 121.9, 120.6, 39.8. GC-MS (EI) *m/z*: 303.

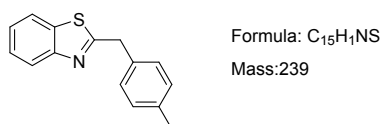

**2-(4-methylbenzyl)benzo[d]thiazole (4h):** The crude product was purified by column chromatography on silica gel (petroleum ether/ethyl acetate =4:1) to give **4h** as white solid (86.0mg, 72%). <sup>1</sup>H NMR (500 MHz, Chloroform-*d*) δ 7.93 (d, *J* = 8.2 Hz, 1H), 7.71 (d, *J* = 8.0 Hz, 1H), 7.38 (t, *J* = 7.7 Hz, 1H), 7.26 (t, *J* = 7.6 Hz, 1H), 7.20 (d, *J* = 7.6 Hz, 2H), 7.10 (d, *J* = 7.8 Hz, 2H), 4.34 (s, 2H), 2.28 (s, 3H). <sup>13</sup>C NMR (126 MHz, Chloroform-*d*) δ 170.8, 152.3, 136.1, 134.7, 133.2, 128.6, 128.1, 125.0, 123.8, 121.8, 120.6, 39.3, 20.2. GC-MS (EI) *m/z*: 239.

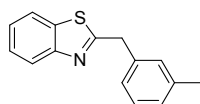

Formula: C<sub>15</sub>H<sub>13</sub>NS

Mass: 239

**2-(3-methylbenzyl)benzo[d]thiazole (4i):** The crude product was purified by column chromatography on silica gel (petroleum ether/ethyl acetate =4:1) to give **4i** as white solid (84.8mg, 71%). <sup>1</sup>H NMR (500 MHz, Chloroform-*d*) δ 7.93 (d, *J* = 8.2 Hz, 1H), 7.70 (d, *J* = 8.0 Hz, 1H), 7.39 (t, *J* = 7.7 Hz, 1H), 7.29 – 7.24 (m, 2H), 7.19 – 7.13 (m, 3H), 4.38 (s, 2H), 2.28 (s, 3H). <sup>13</sup>C NMR (126 MHz, Chloroform-*d*) δ 137.6, 136.1, 134.8, 128.9, 127.8, 127.1, 125.2, 125.0, 123.8, 121.8, 120.6. GC-MS (EI) *m/z*: 239.

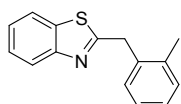

Formula: C<sub>15</sub>H<sub>13</sub>NS

Mass: 239

**2-(2-methylbenzyl)benzo[d]thiazole (4j):** The crude product was purified by column chromatography on silica gel (petroleum ether/ethyl acetate =4:1) to give **4j** as white solid (89.6mg, 75%). <sup>1</sup>H NMR (500 MHz, Chloroform-*d*) δ 7.92 (d, *J* = 8.2 Hz, 1H), 7.70 (d, *J* = 8.0 Hz, 1H), 7.38 (t, *J* = 7.6 Hz, 1H), 7.25 (d, *J* = 8.1 Hz, 2H), 7.17 (dd, *J* = 8.9, 6.4 Hz, 3H), 4.38 (s, 2H), 2.27 (s, 3H). <sup>13</sup>C NMR (126 MHz, Chloroform-*d*) δ 170.5, 152.5, 135.9, 134.6, 129.7, 129.2, 126.9, 125.5, 125.0, 123.8, 121.7, 120.5, 37.6, 18.7. GC-MS (EI) *m/z*: 239.

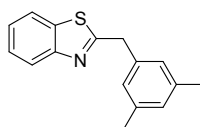

Formula: C<sub>16</sub>H<sub>15</sub>NS

Mass: 253

**2-(3,5-dimethylbenzyl)benzo[d]thiazole(4k):** The crude product was purified by column chromatography on silica gel (petroleum ether/ethyl acetate =4:1) to give **4k** as white solid (97.4mg, 77%). <sup>1</sup>H NMR (500 MHz, Chloroform-*d*) δ 7.92 (d, *J* = 8.2 Hz, 1H), 7.71 (d, *J* = 8.0 Hz, 1H), 7.37 (t, *J* = 7.7 Hz, 1H), 7.25 (t, *J* = 7.6 Hz, 1H), 6.87 (d, *J* = 28.8 Hz, 3H), 4.28 (s, 2H), 2.22 (s, 6H). <sup>13</sup>C NMR (126 MHz, Chloroform-*d*) δ 152.3, 137.5, 136.1, 128.0, 126.0, 124.9, 123.8, 121.8, 120.5, 39.6, 20.3. GC-MS (EI) *m/z*: 253.

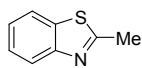

Formula: C<sub>8</sub>H<sub>7</sub>NS

Mass: 149

**2-(3,5-dimethylbenzyl)benzo[d]thiazole(5a):** The crude product was purified by column chromatography on silica gel (petroleum ether/ethyl acetate =4:1) to give **5a** as white solid (55.9mg, 75%). <sup>1</sup>H NMR (500 MHz, Chloroform-*d*) δ 7.95 (d, *J* = 8.2 Hz, 1H), 7.79 (d, *J* = 8.0 Hz, 1H), 7.42 (t, *J* = 7.7 Hz, 1H), 7.31 (t, *J* = 7.6 Hz, 1H), 2.81 (s, 3H). <sup>13</sup>C NMR (126 MHz, Chloroform-*d*) δ 165.9, 152.4, 134.7, 124.9, 123.7, 121.4, 120.4, 19.1. GC-MS (EI) *m/z*: 149.

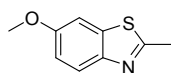

Formula: C<sub>9</sub>H<sub>9</sub>NOS

Mass: 179



**6-methoxy-2-methylbenzo[d]thiazole(5b)**: The crude product was purified by column chromatography on silica gel (petroleum ether/ethyl acetate =4:1) to give **5b** as white solid (56.4mg, 63%). <sup>1</sup>H NMR (500 MHz, Chloroform-*d*) δ 7.82 (d, *J* = 8.9 Hz, 1H), 7.28 (d, *J* = 2.5 Hz, 1H), 7.03 (dd, *J* = 8.9, 2.5 Hz, 1H), 3.86 (s, 3H), 2.78 (s, 3H). <sup>13</sup>C NMR (126 MHz, Chloroform-*d*) δ 163.4, 156.4, 146.9, 135.9, 121.8, 114.0, 103.2, 54.8, 19.0. GC-MS (EI) *m/z*: 179.

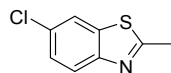

Formula: C<sub>8</sub>H<sub>6</sub>ClNS  
Mass: 183

**6-chloro-2-methylbenzo[d]thiazole (5c)**: The crude product was purified by column chromatography on silica gel (petroleum ether/ethyl acetate =4:1) to give **5c** as white solid (64.1mg, 70%). <sup>1</sup>H NMR (500 MHz, Chloroform-*d*) δ 7.84 (d, *J* = 8.7 Hz, 1H), 7.79 (d, *J* = 2.0 Hz, 1H), 7.40 (dd, *J* = 8.7, 2.1 Hz, 1H), 2.82 (s, 3H). <sup>13</sup>C NMR (126 MHz, Chloroform-*d*) δ 166.5, 151.0, 135.9, 129.6, 125.7, 122.1, 120.1, 19.2. GC-MS (EI) *m/z*: 183.

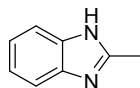

Formula: C<sub>8</sub>H<sub>8</sub>N<sub>2</sub>  
Mass: 132

**2-methyl-1H-benzo[d]imidazole (5d)**: The crude product was purified by column chromatography on silica gel (petroleum ether/ethyl acetate =4:1) to give **5d** as white solid (43.6mg, 66%). <sup>1</sup>H NMR (500 MHz, DMSO-*d*<sub>6</sub>) δ 12.11 (s, 1H), 7.39 (dd, *J* = 6.0, 3.4 Hz, 2H), 7.04 (dd, *J* = 5.9, 3.2 Hz, 2H), 2.43 (s, 3H). <sup>13</sup>C NMR (126 MHz, DMSO-*d*<sub>6</sub>) δ 155.7, 150.7, 120.5, 114.3, 14.1. GC-MS (EI) *m/z*: 132.

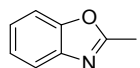

Formula: C<sub>8</sub>H<sub>7</sub>NO  
Mass: 133

**2-methylbenzo[d]oxazole(5e)**: The crude product was purified by column chromatography on silica gel (petroleum ether/ethyl acetate =4:1) to give **5e** as white solid (45.2mg, 68%). <sup>1</sup>H NMR (500 MHz, Chloroform-*d*) δ 7.7 – 7.6 (m, 1H), 7.5 – 7.4 (m, 1H), 7.3 – 7.2 (m, 2H), 2.6 (s, 3H). <sup>13</sup>C NMR (126 MHz, Chloroform-*d*) δ 162.8, 150.0, 140.6, 123.4, 123.1, 118.4, 109.2, 13.5. GC-MS (EI) *m/z*: 133.

## 4. NMR spectra

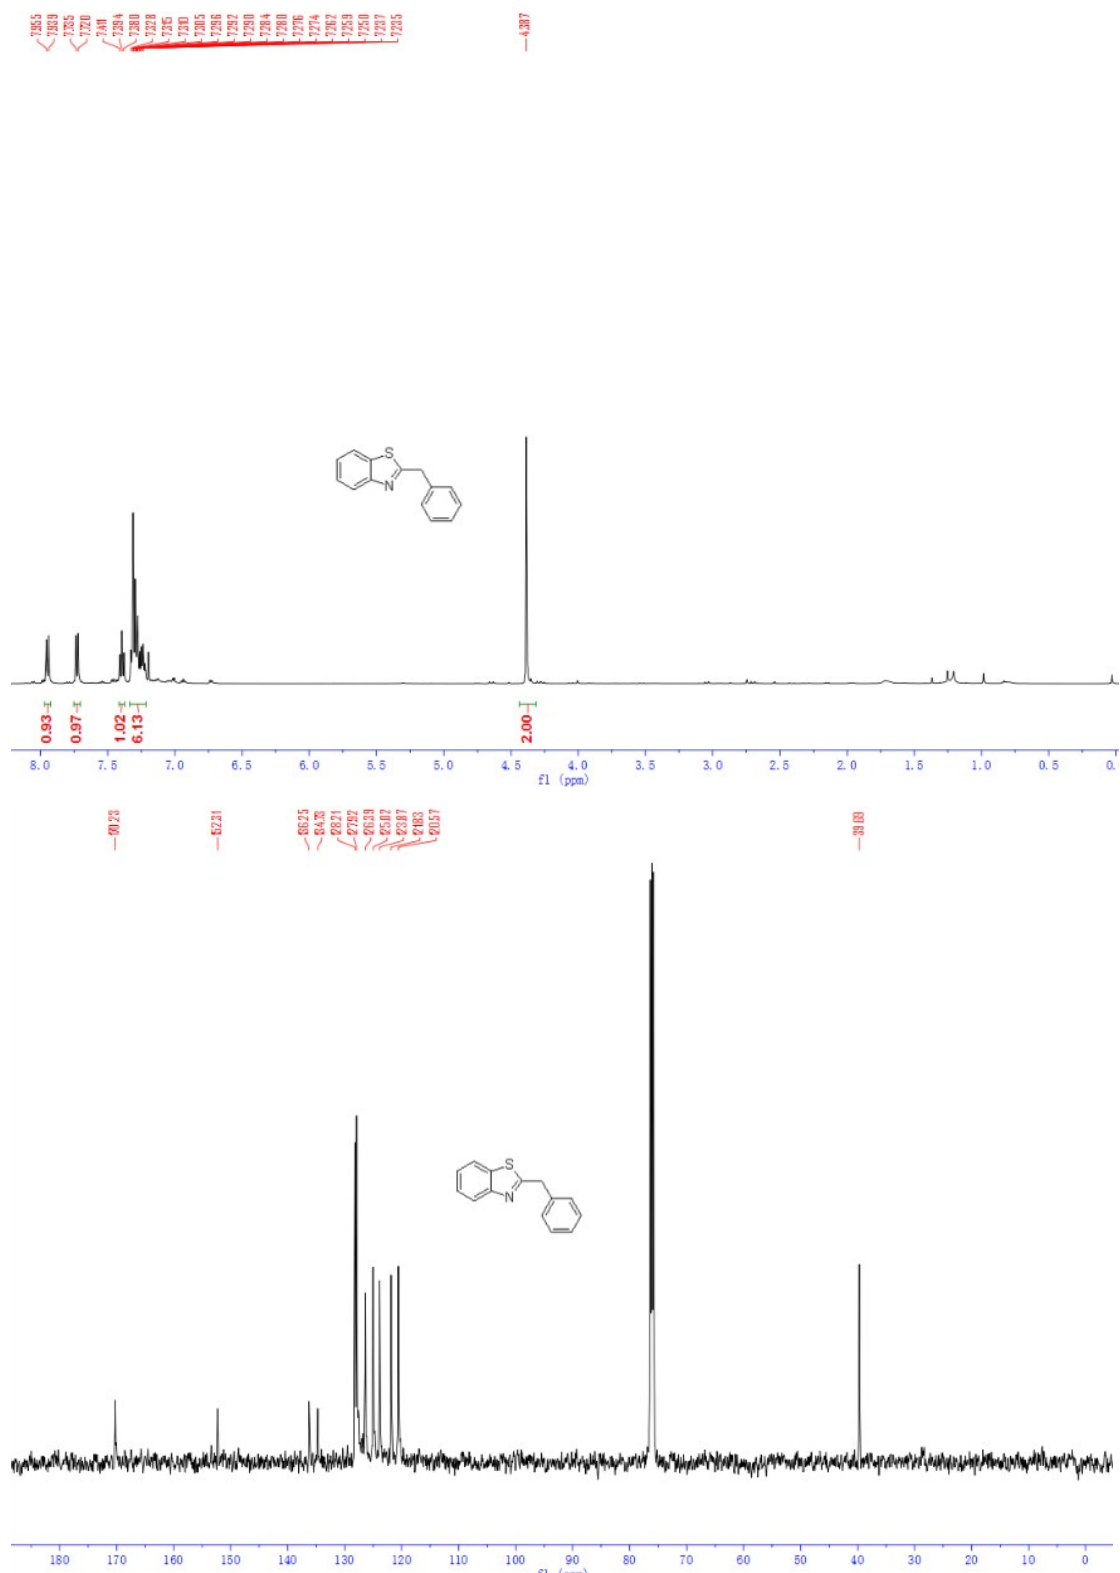

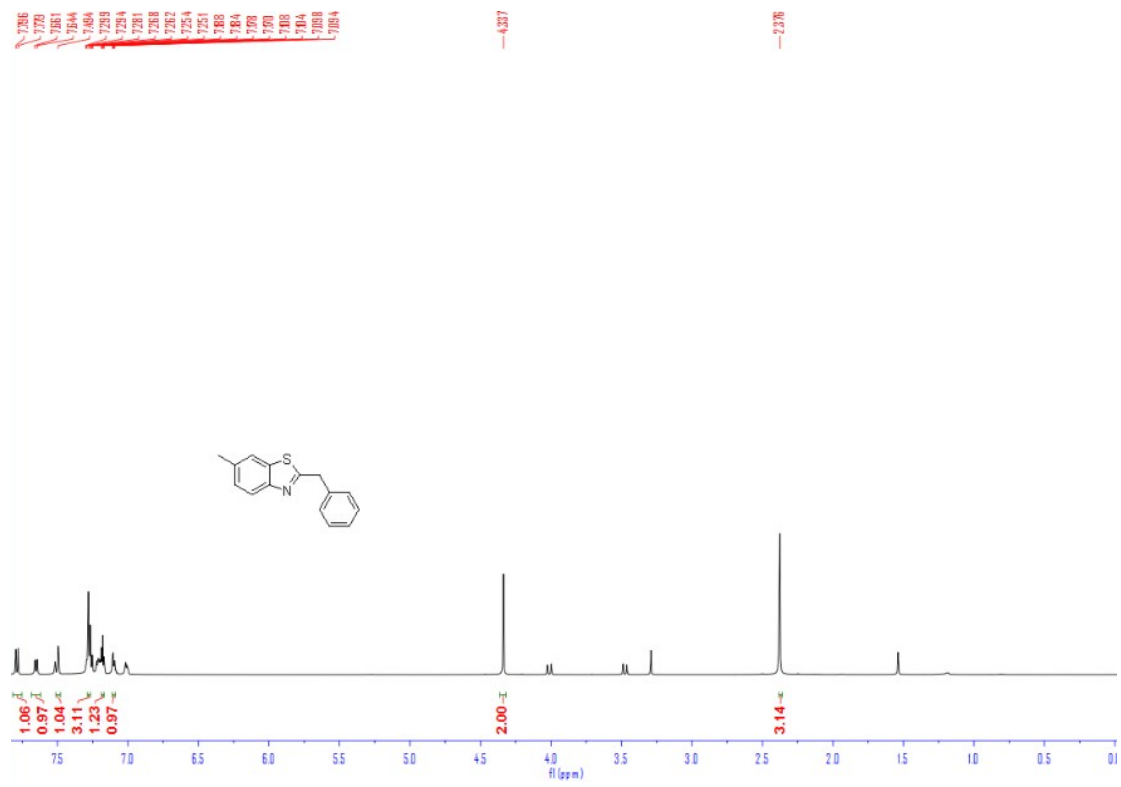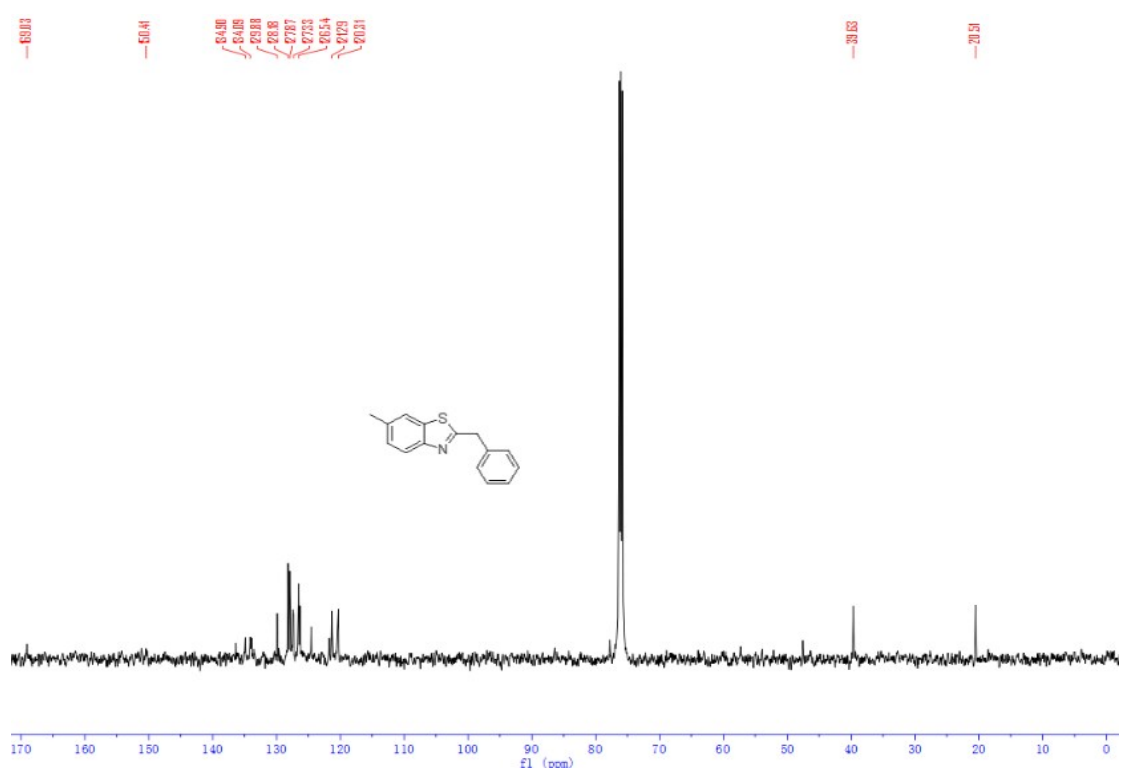

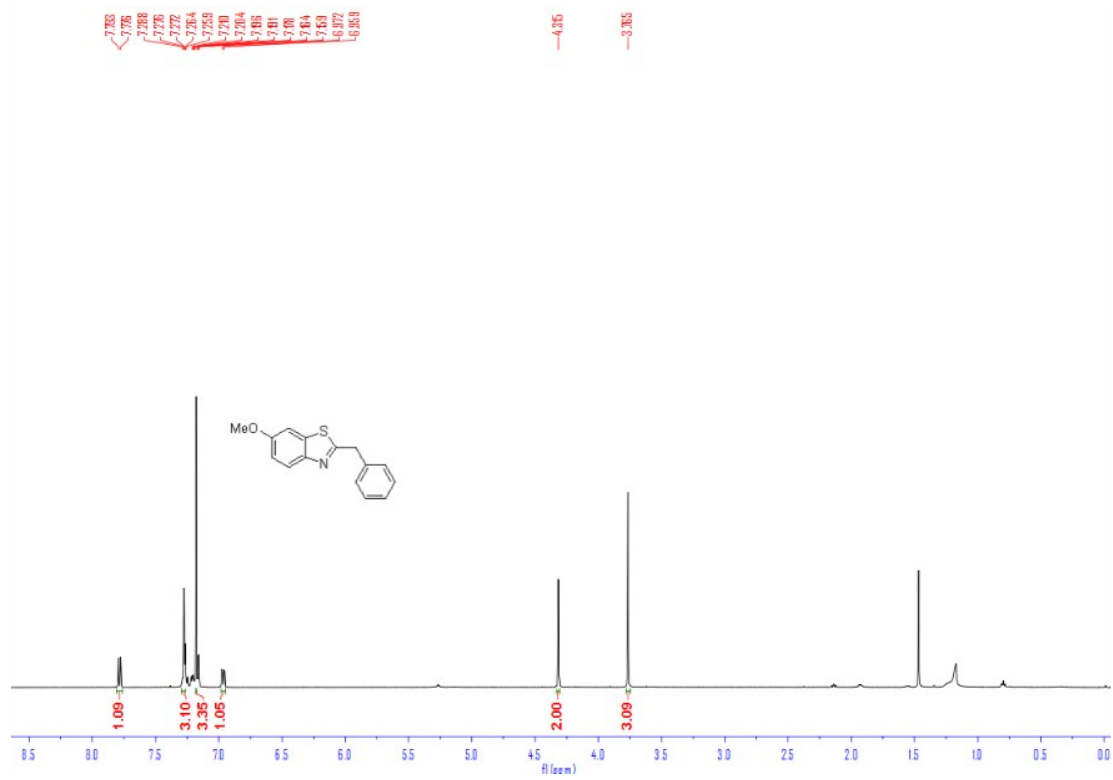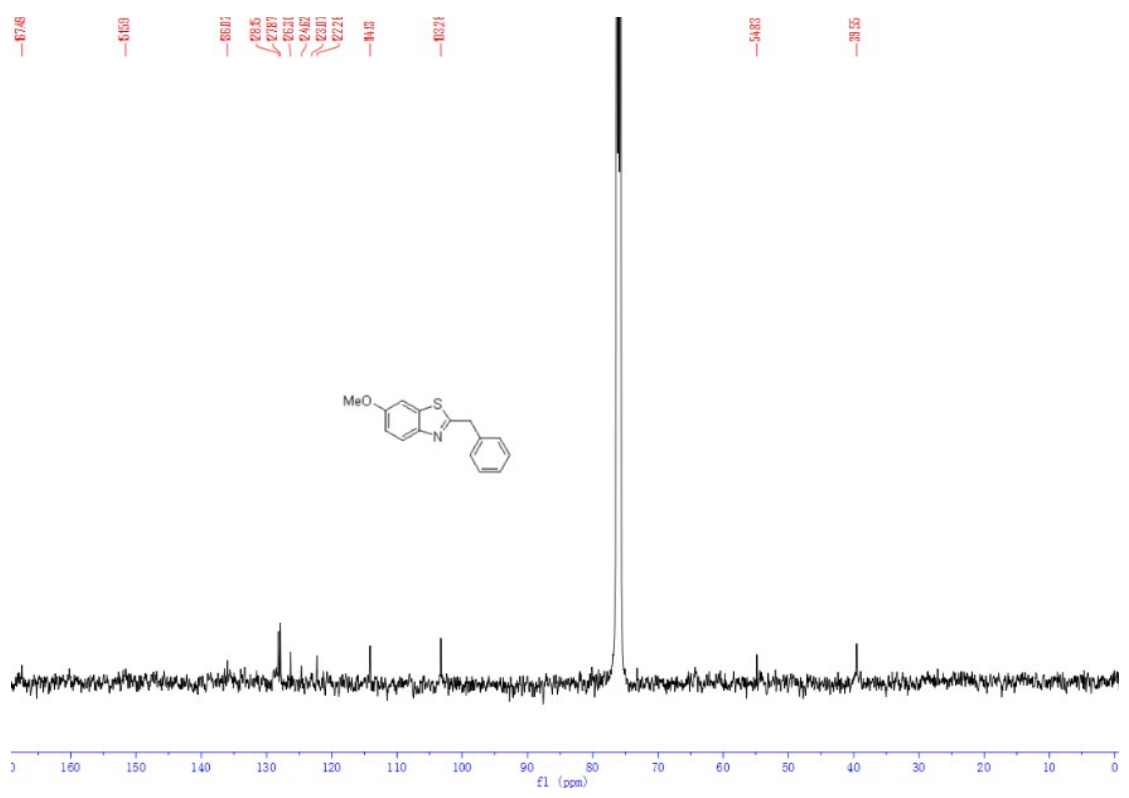

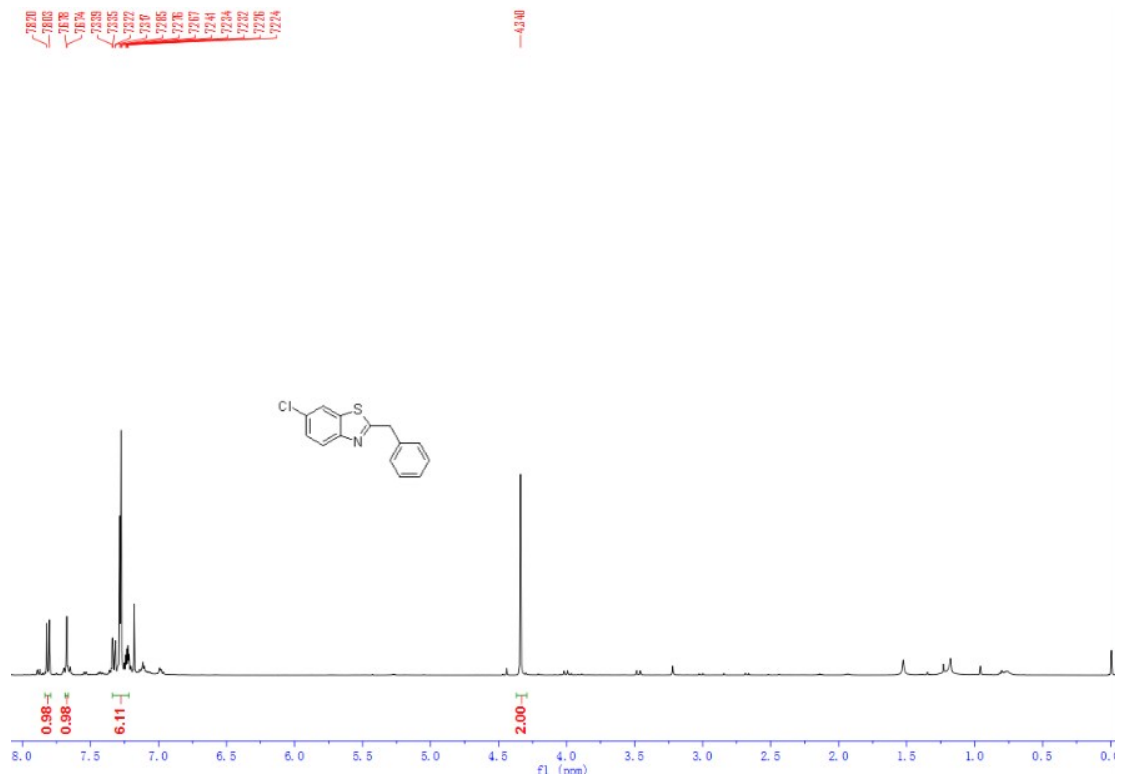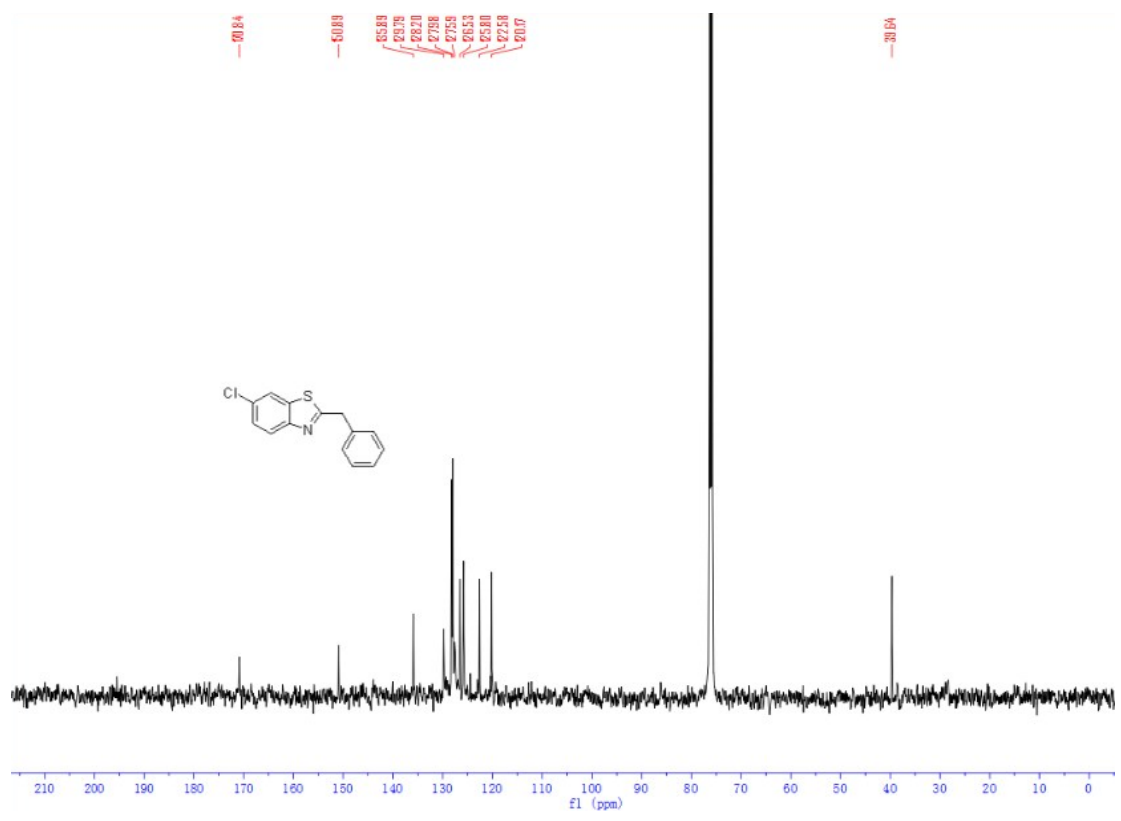

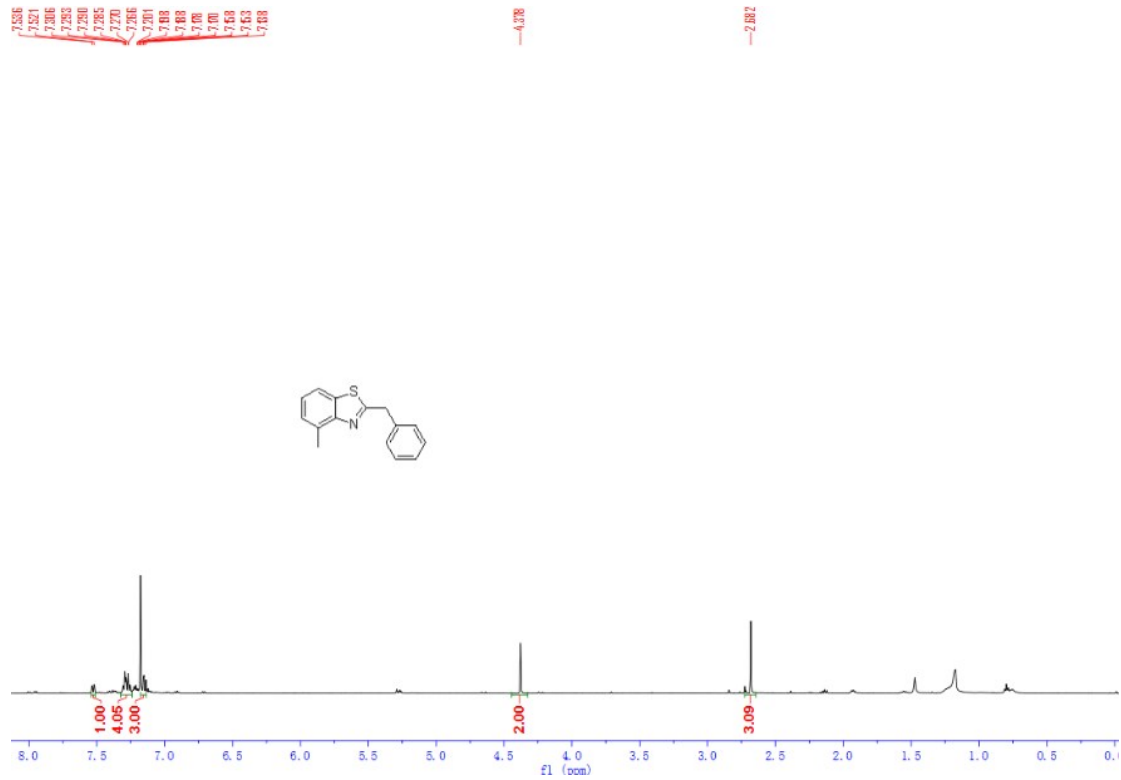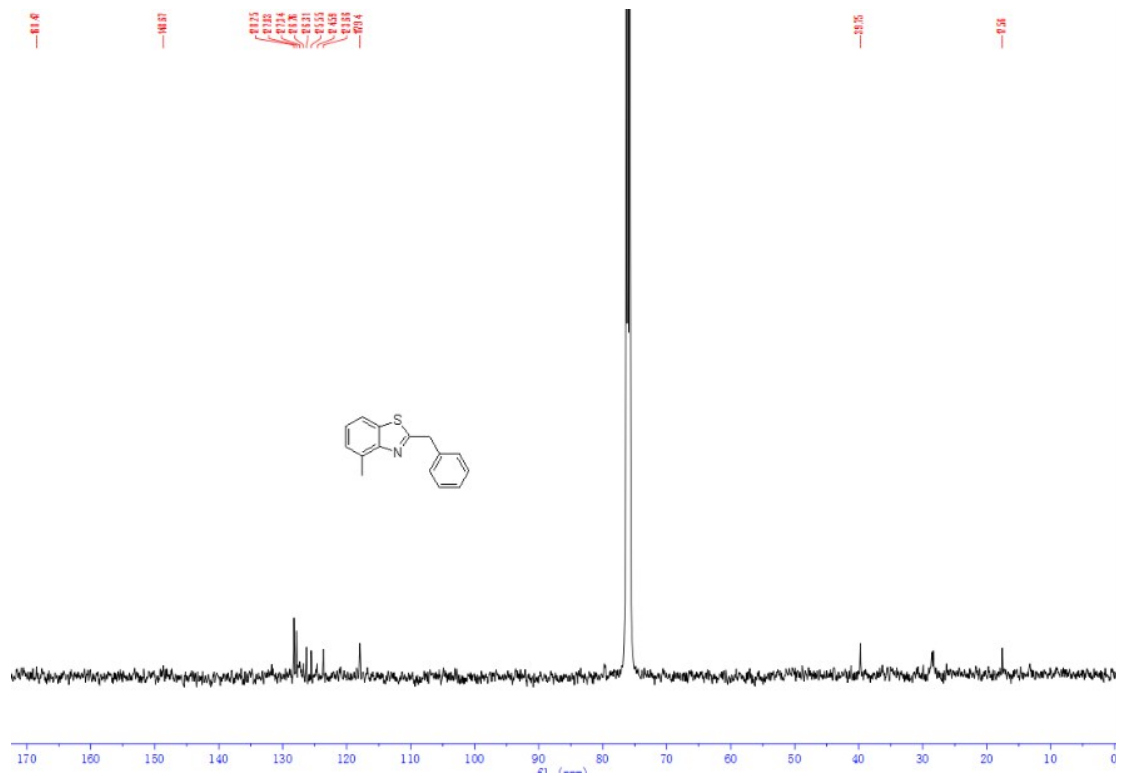

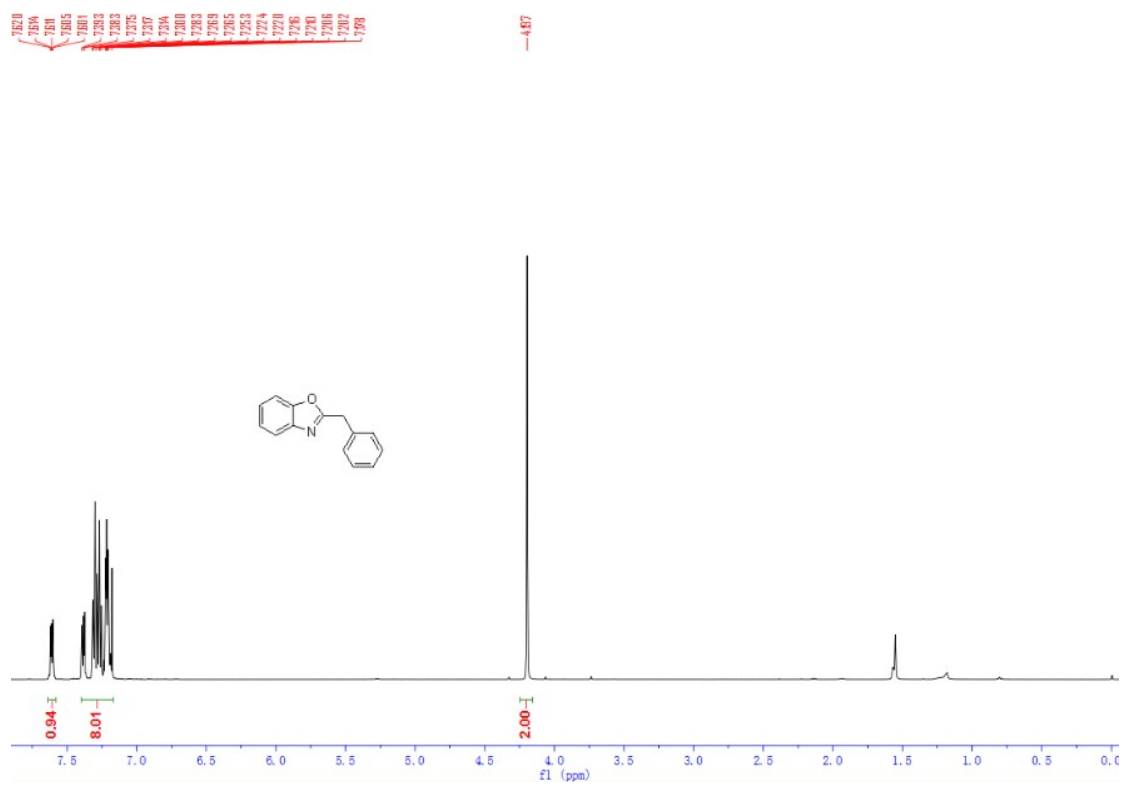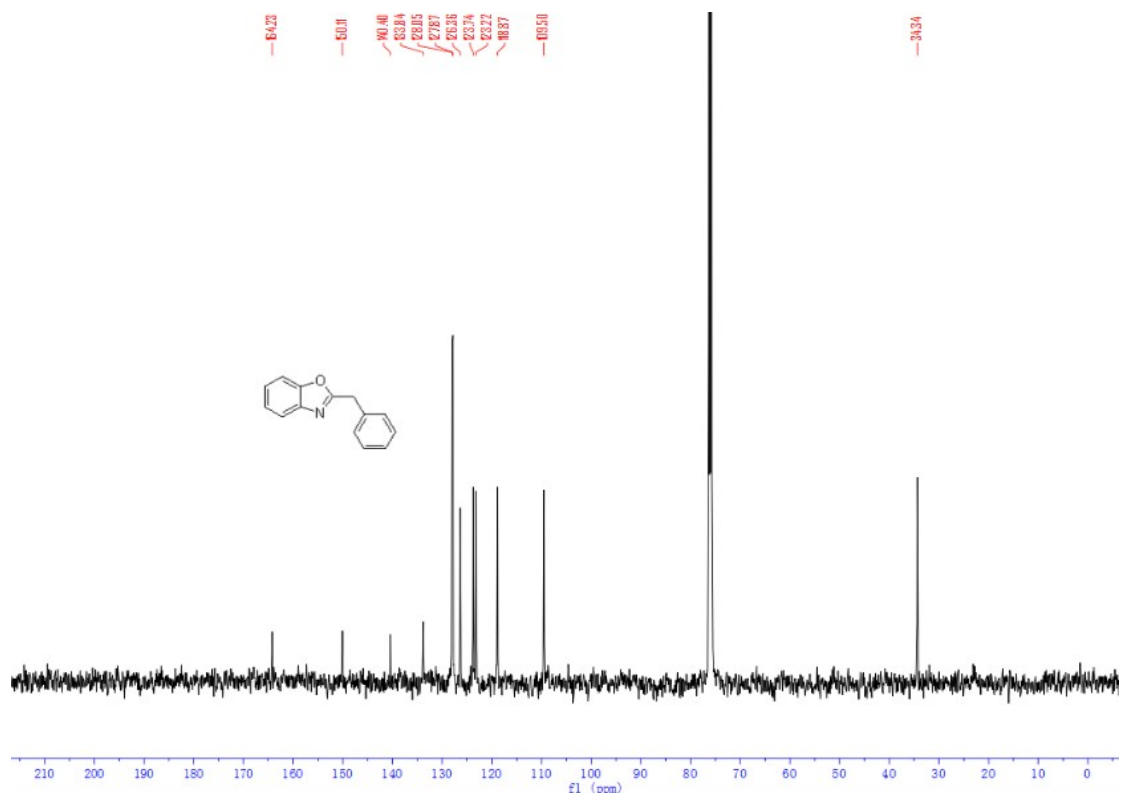

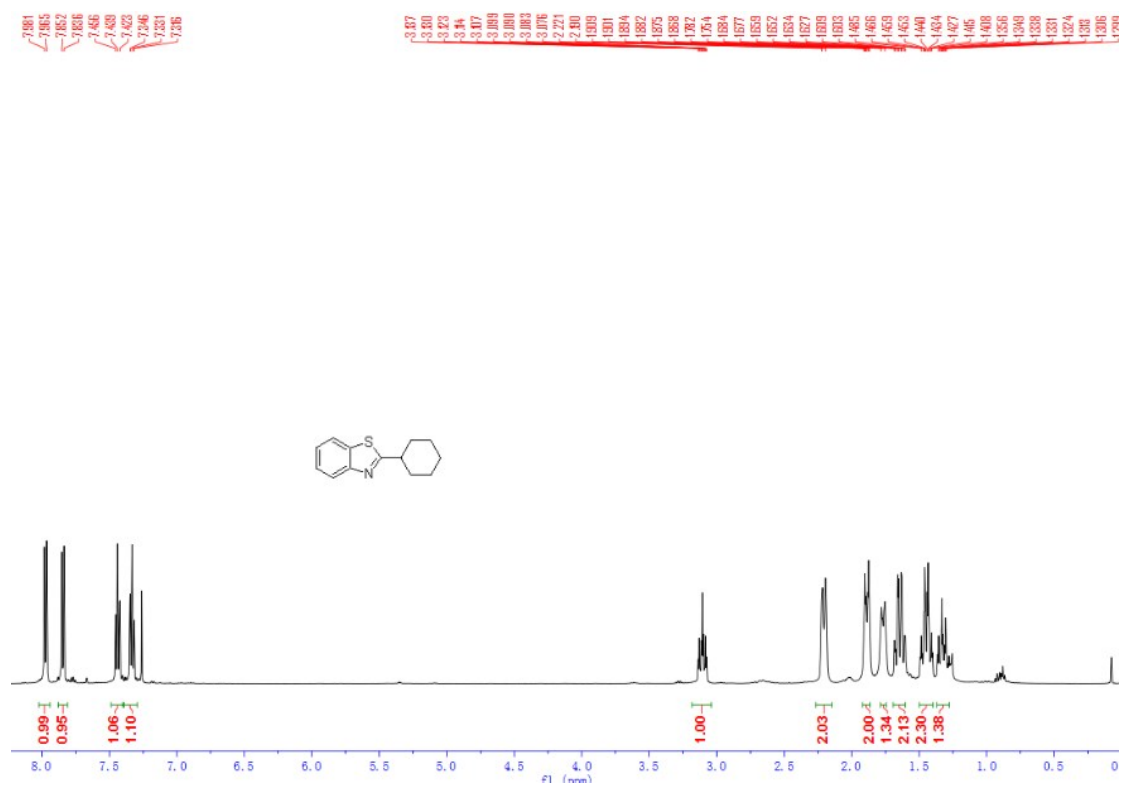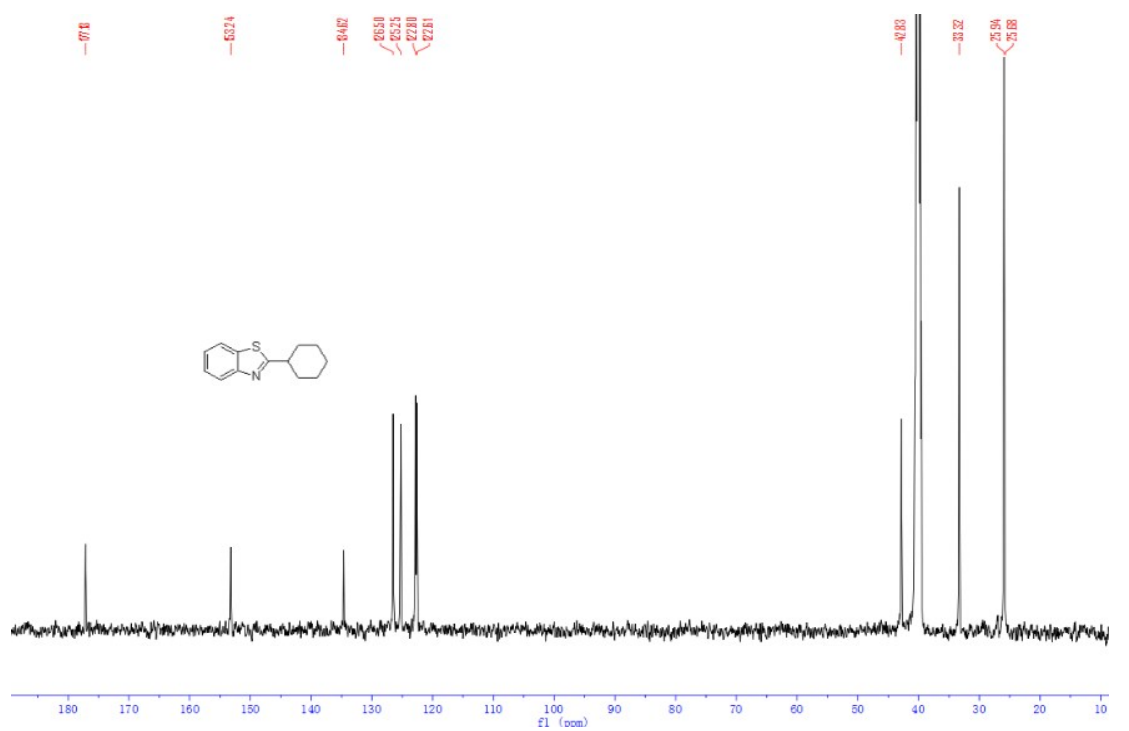



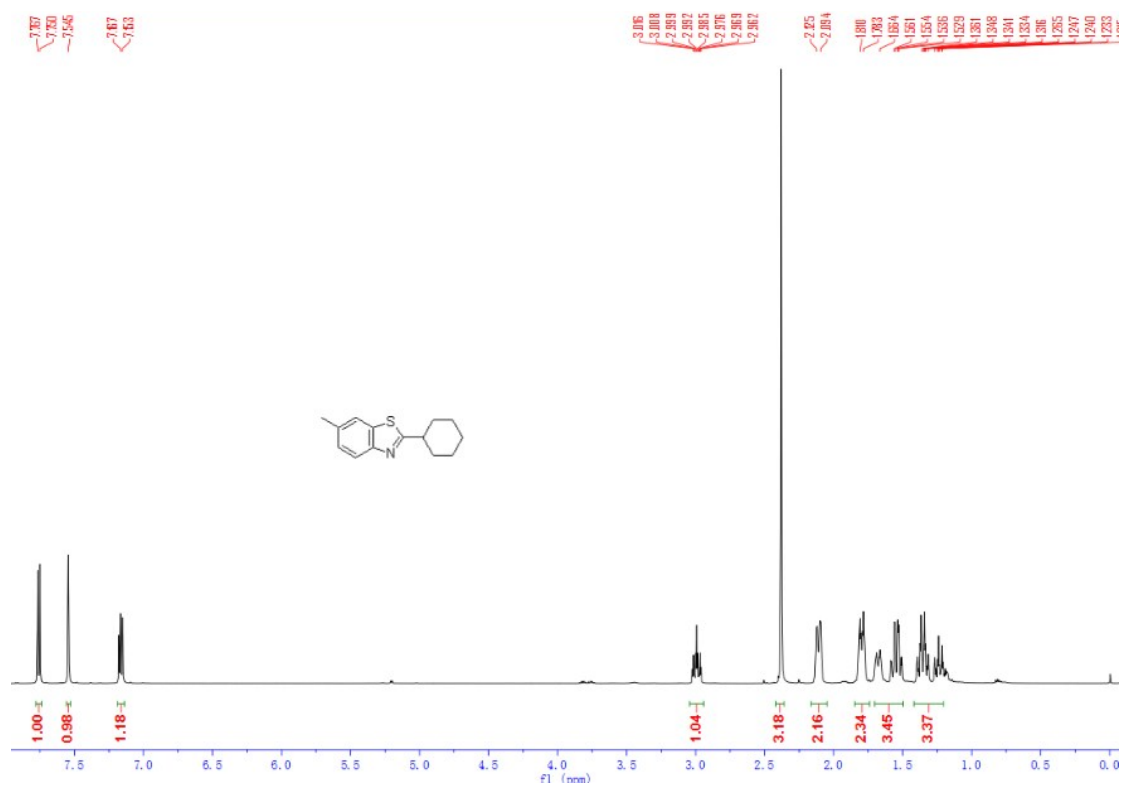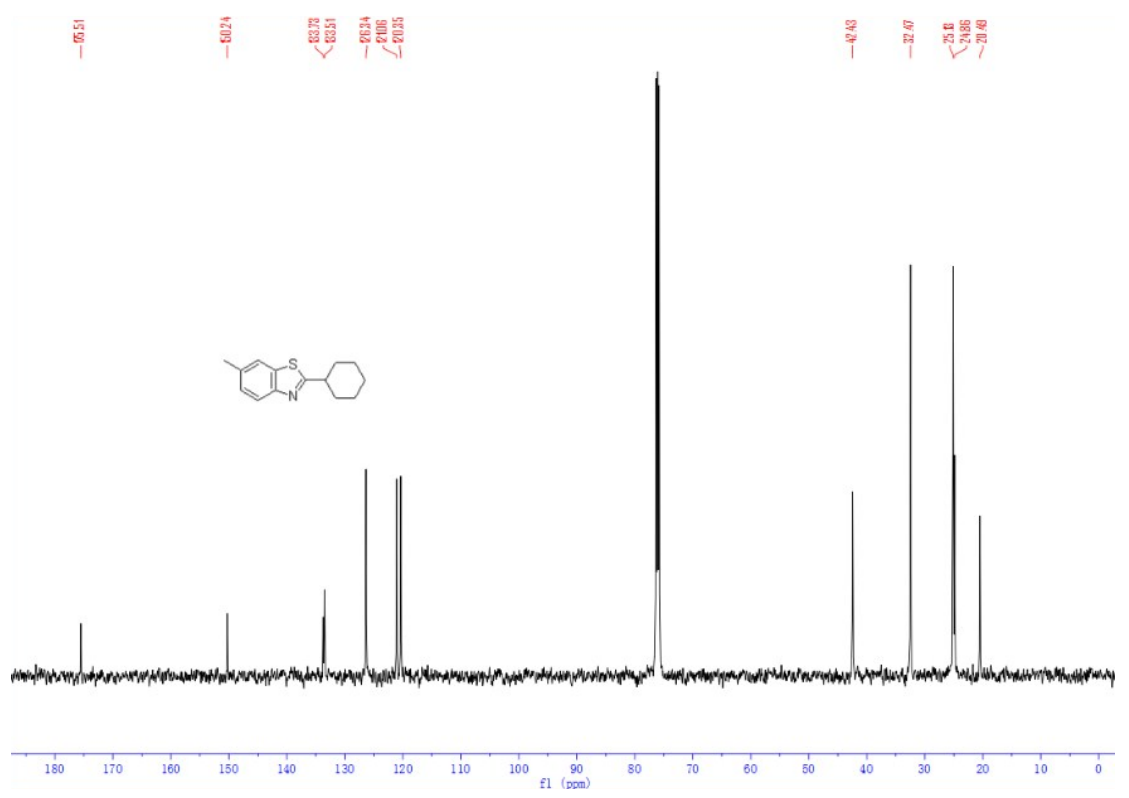

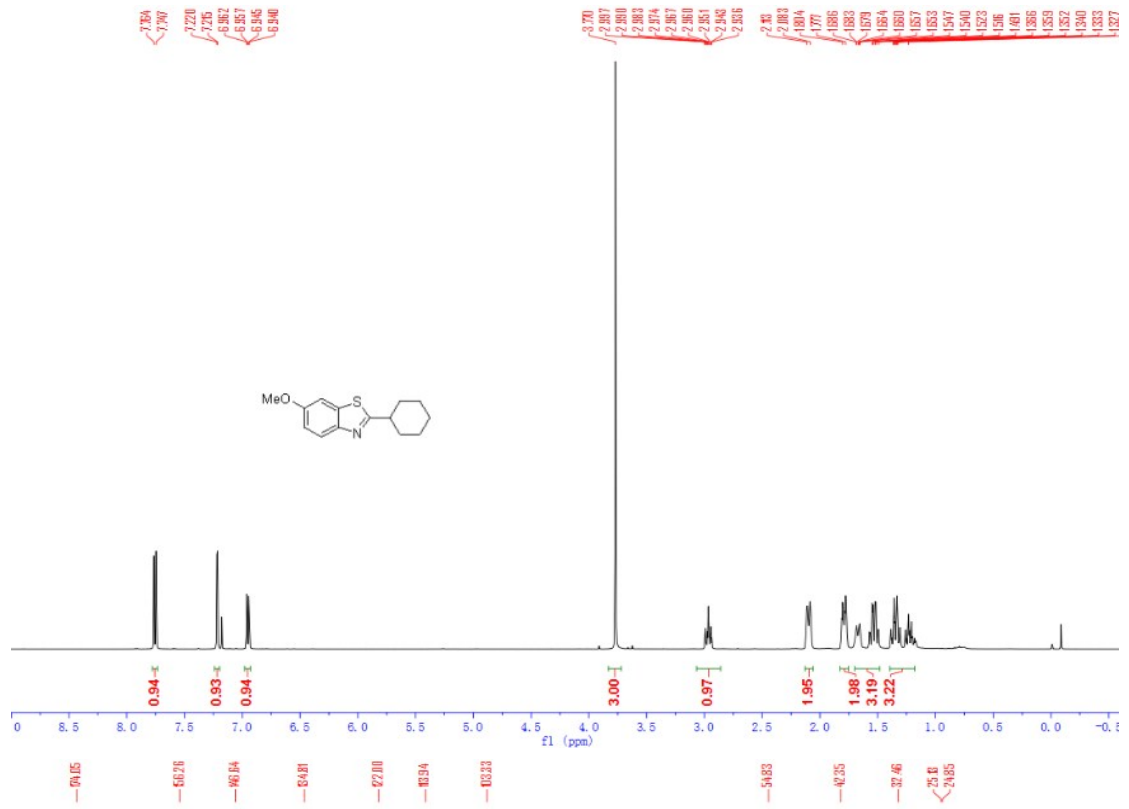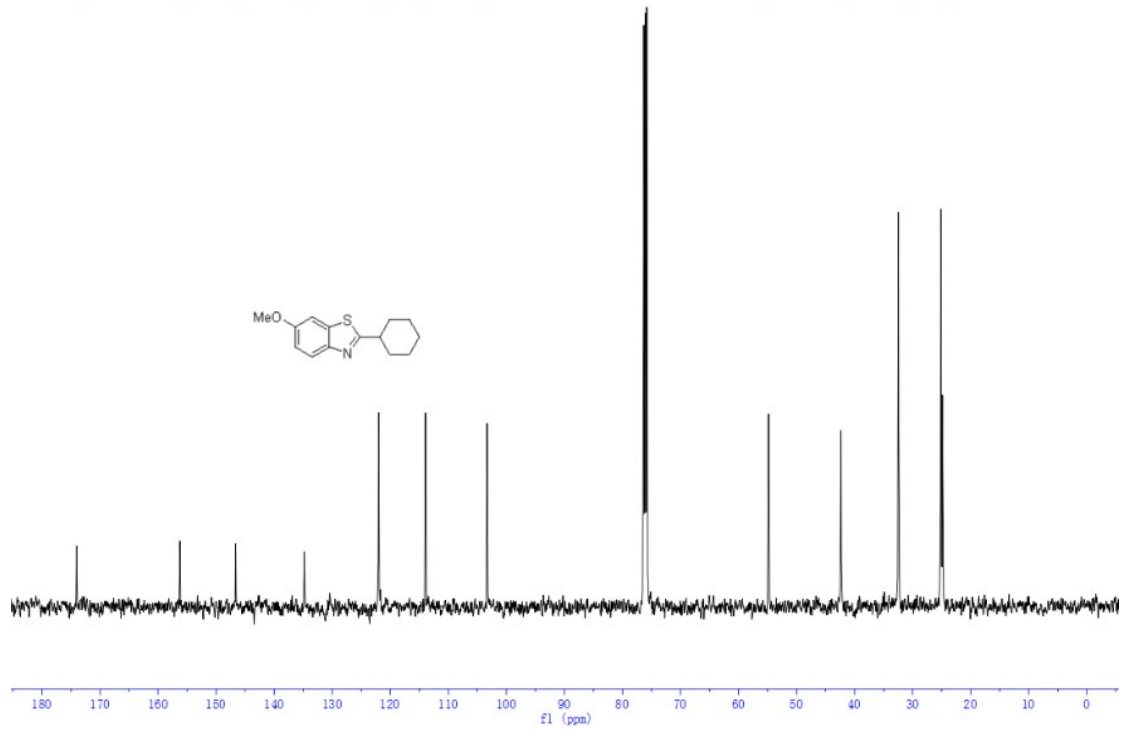

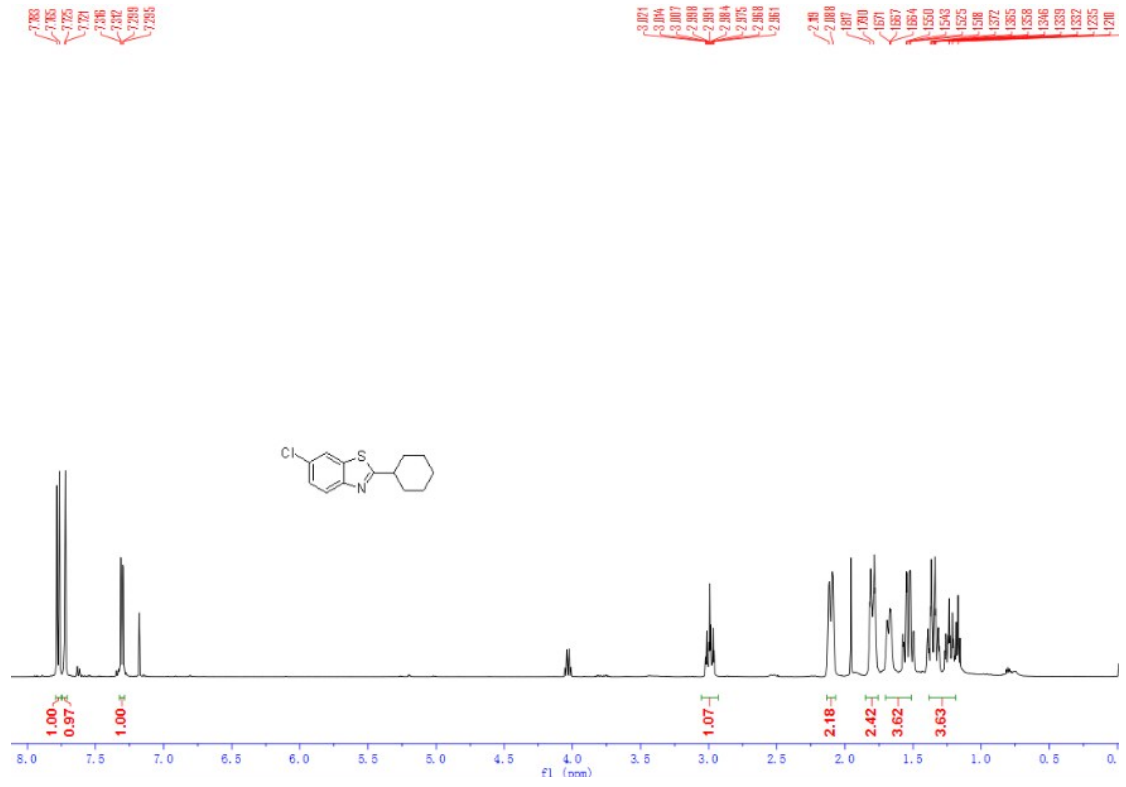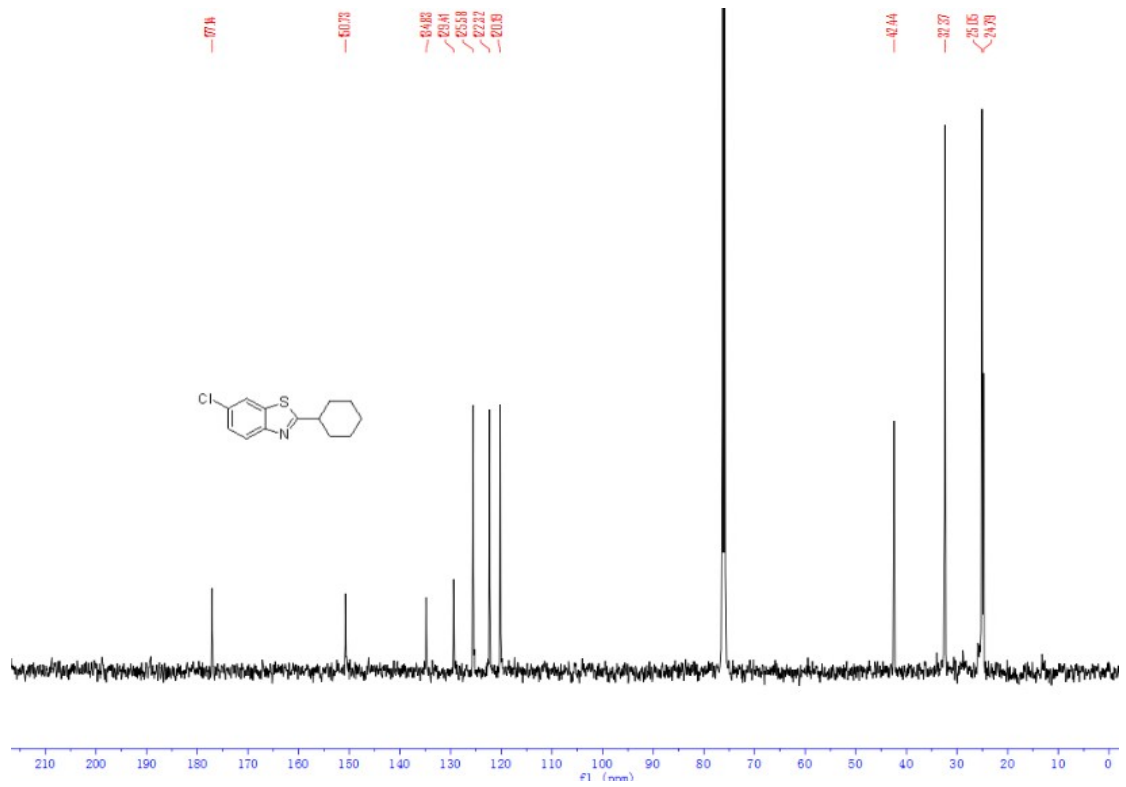

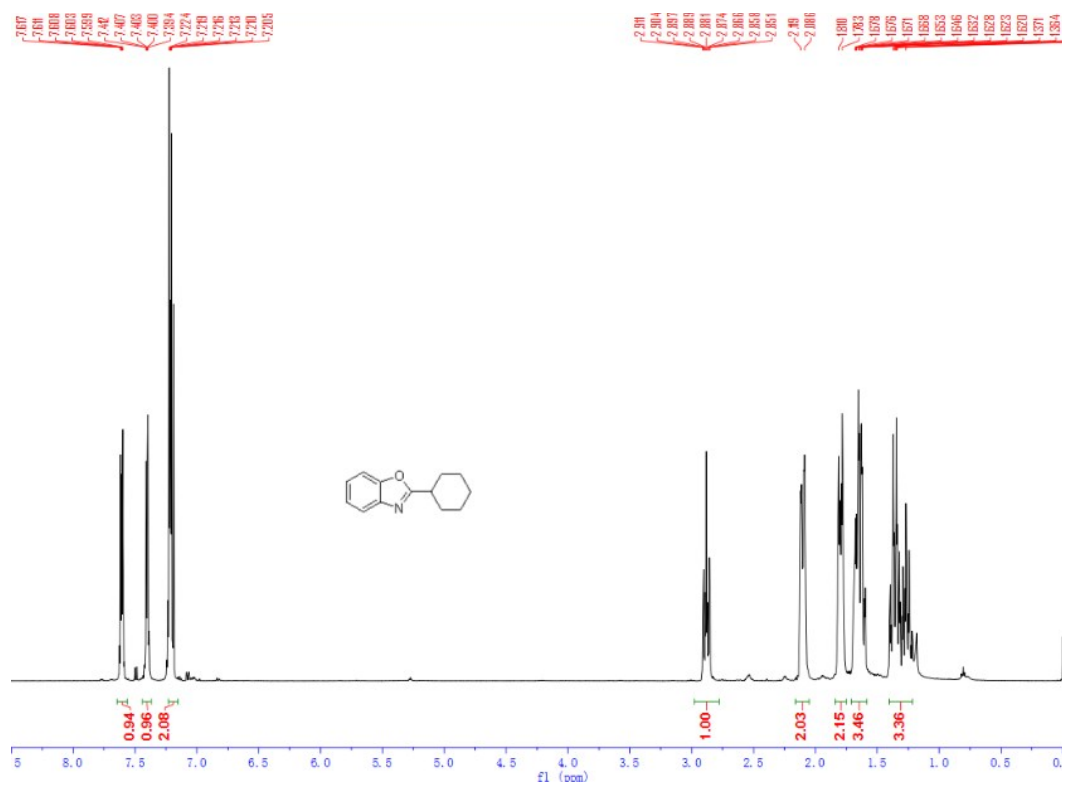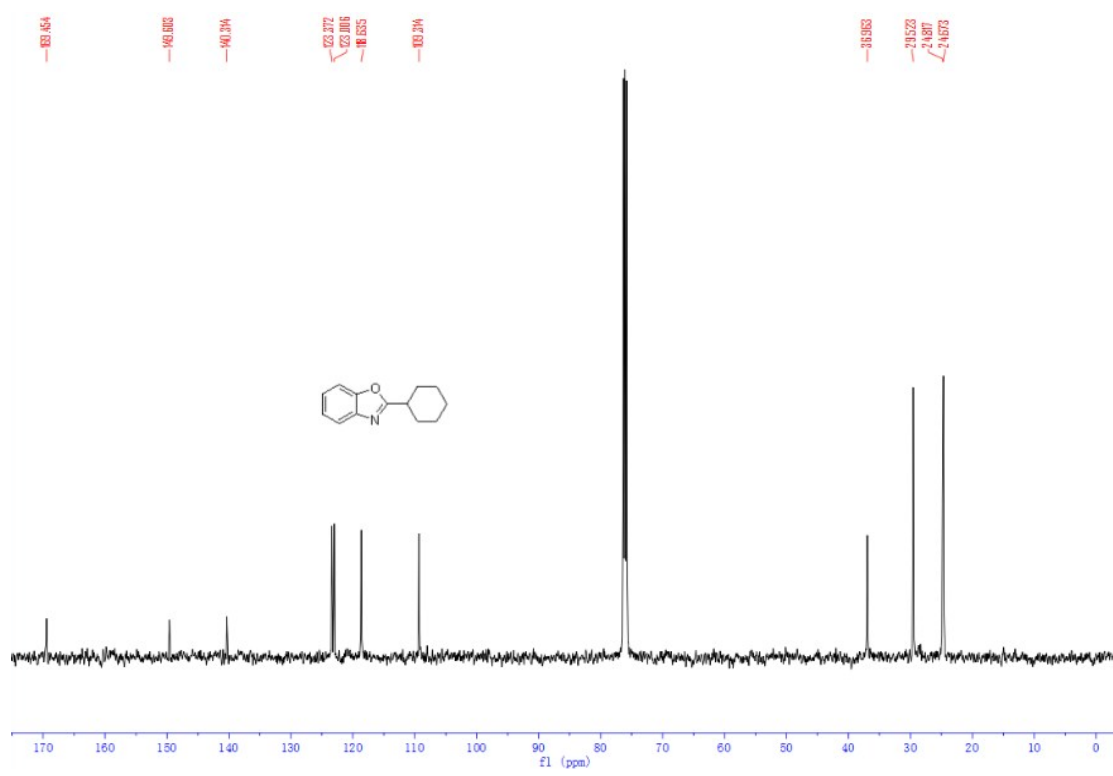

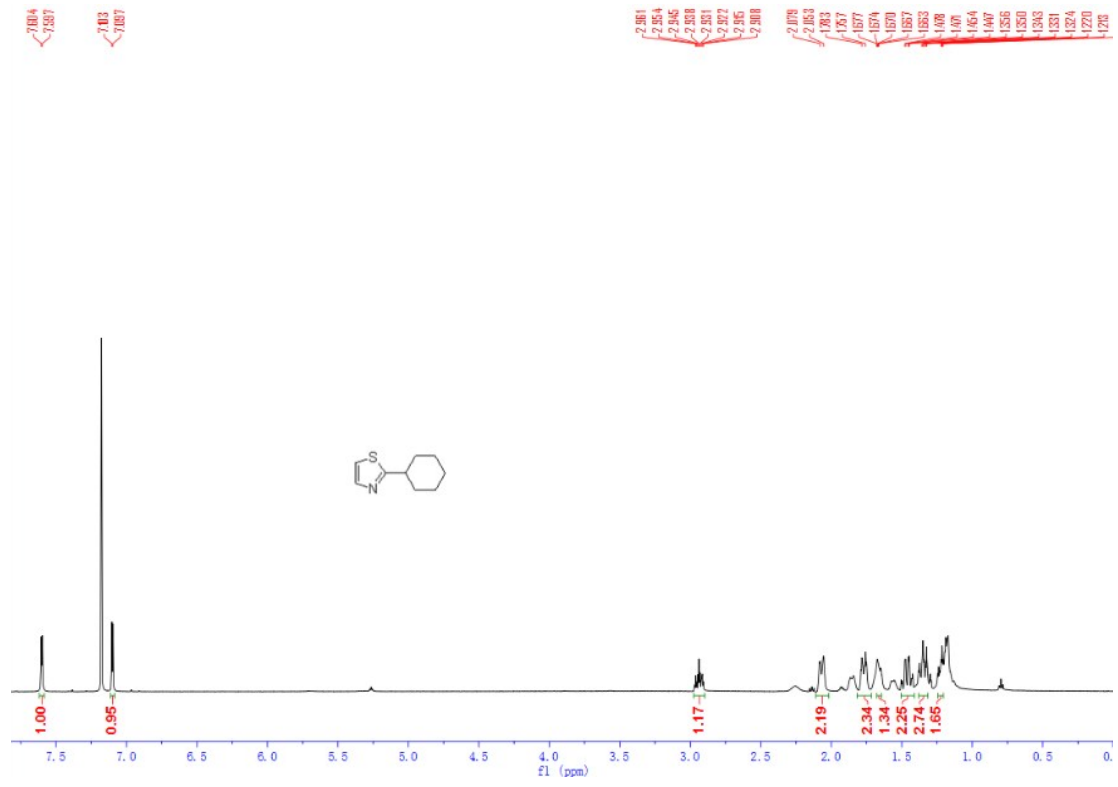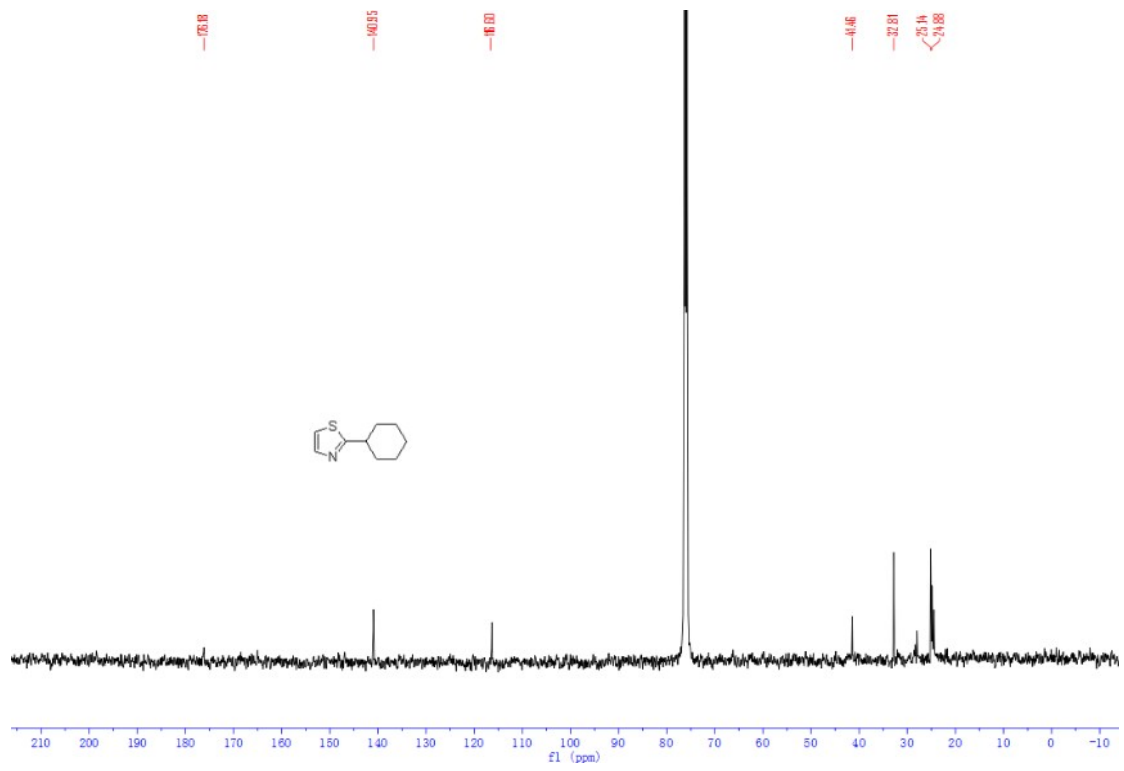

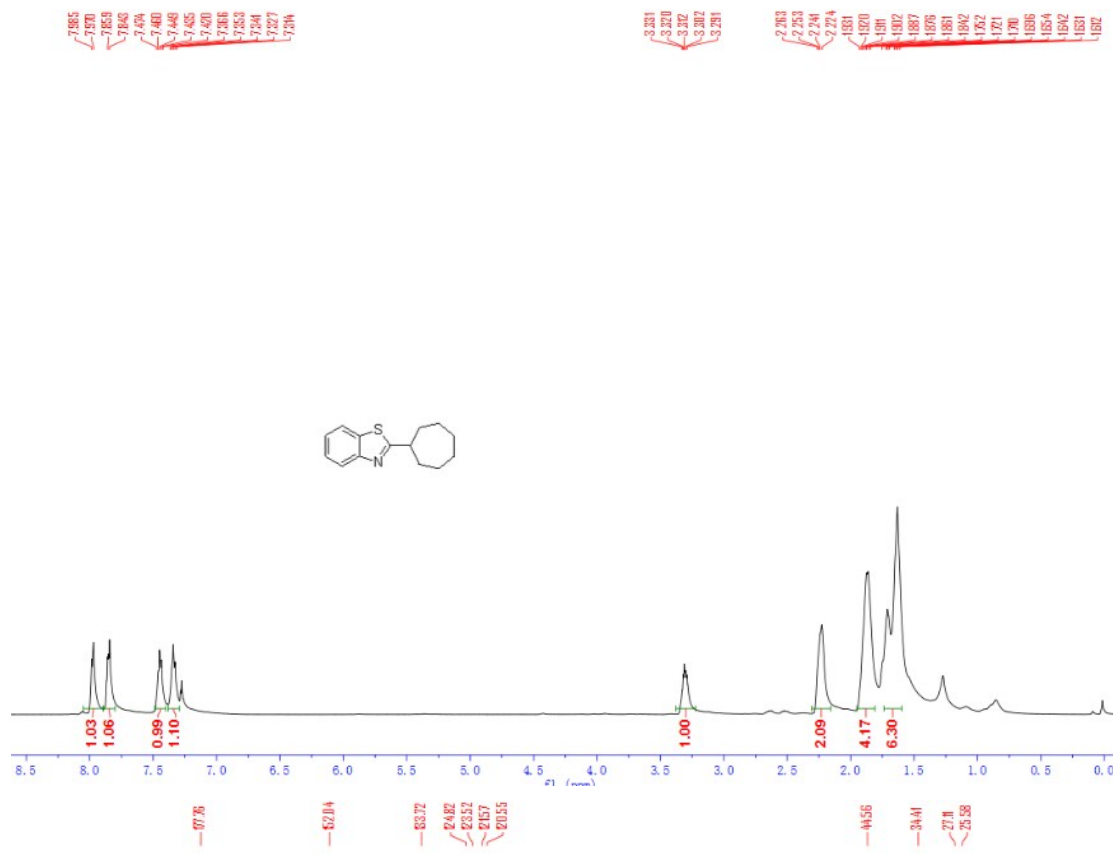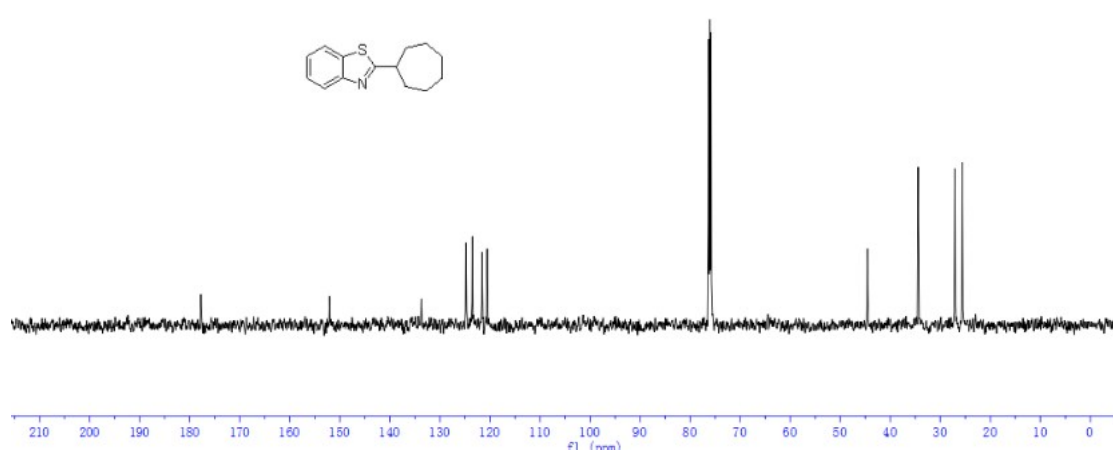

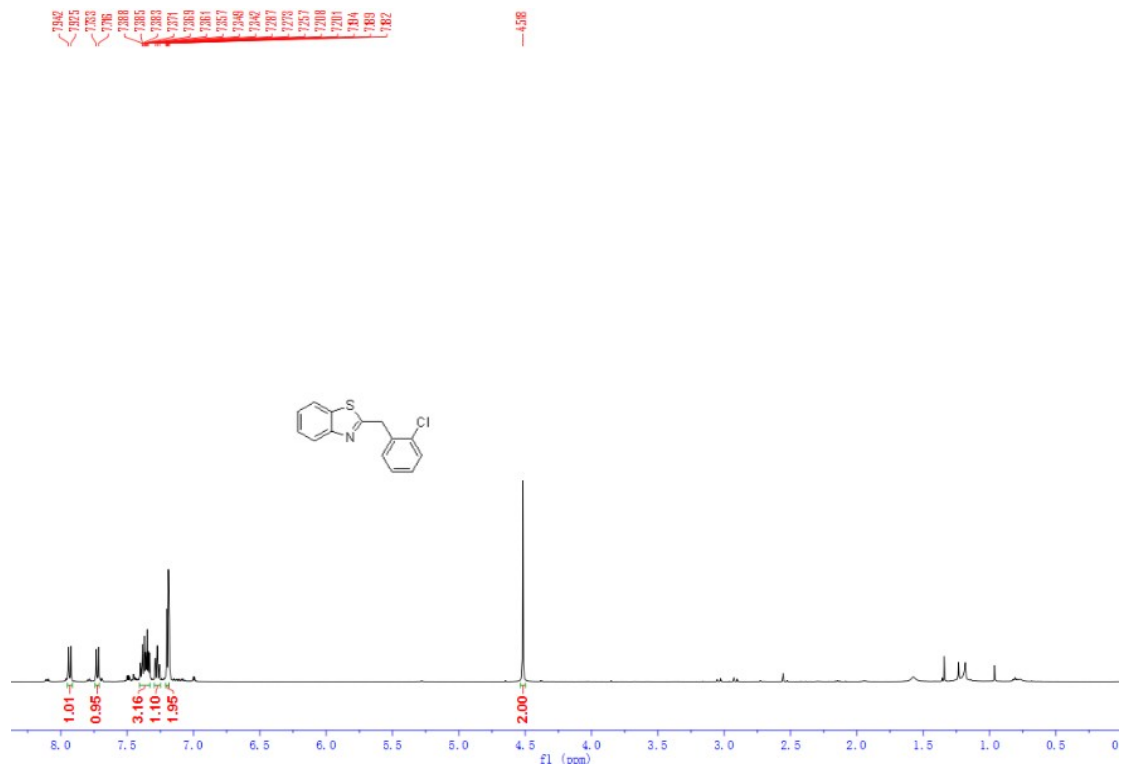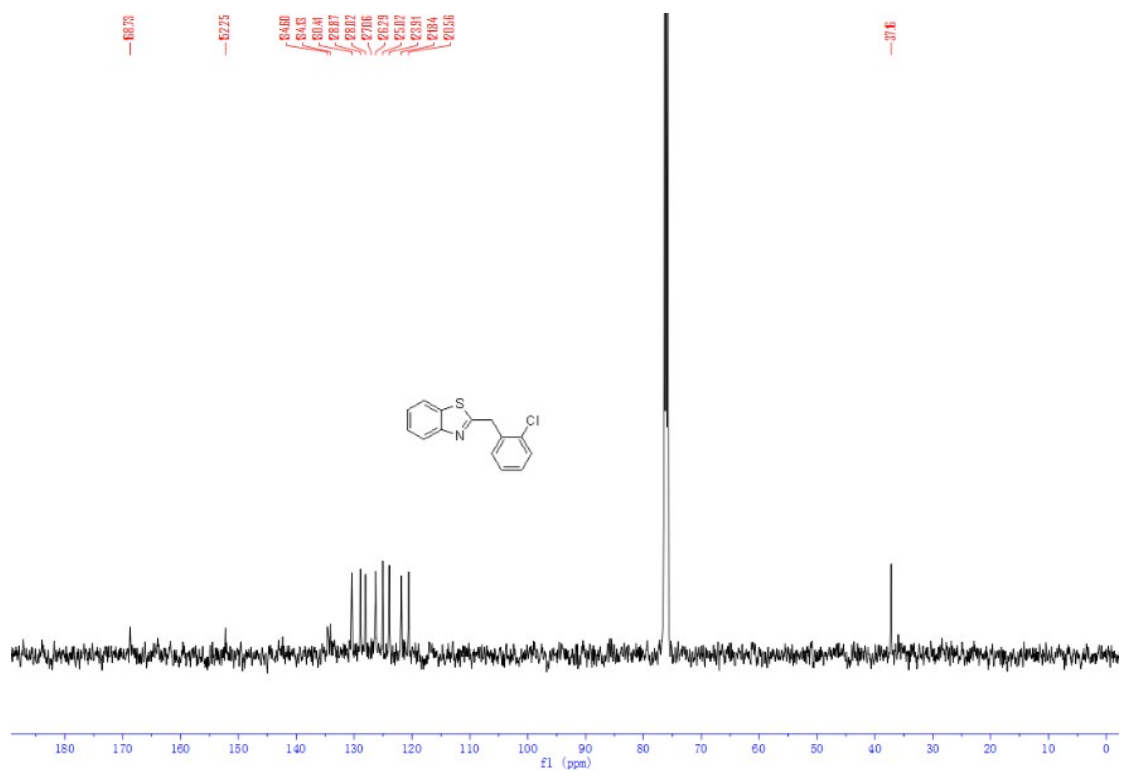

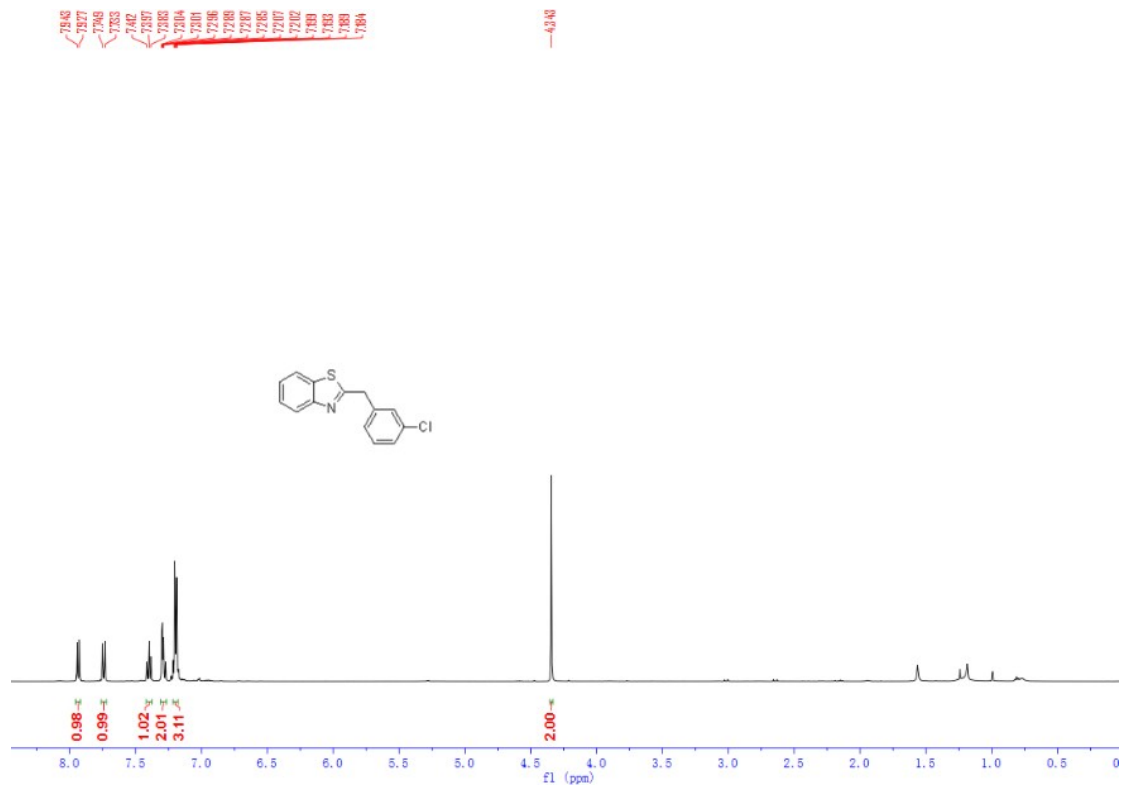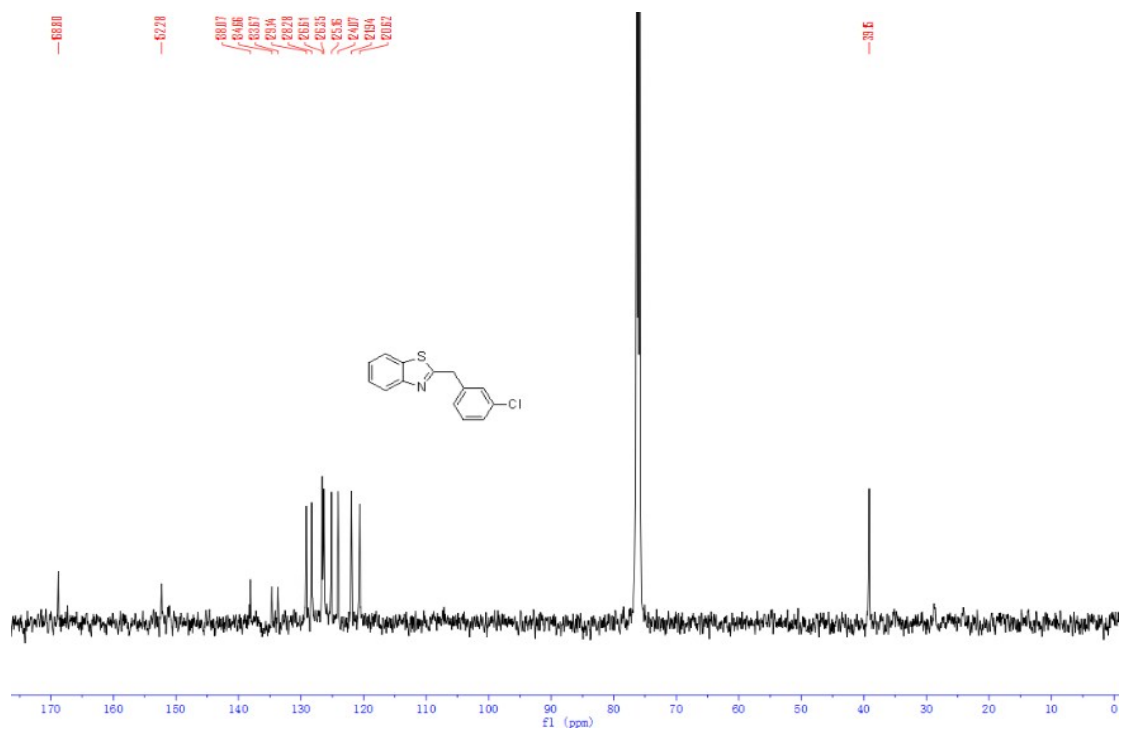



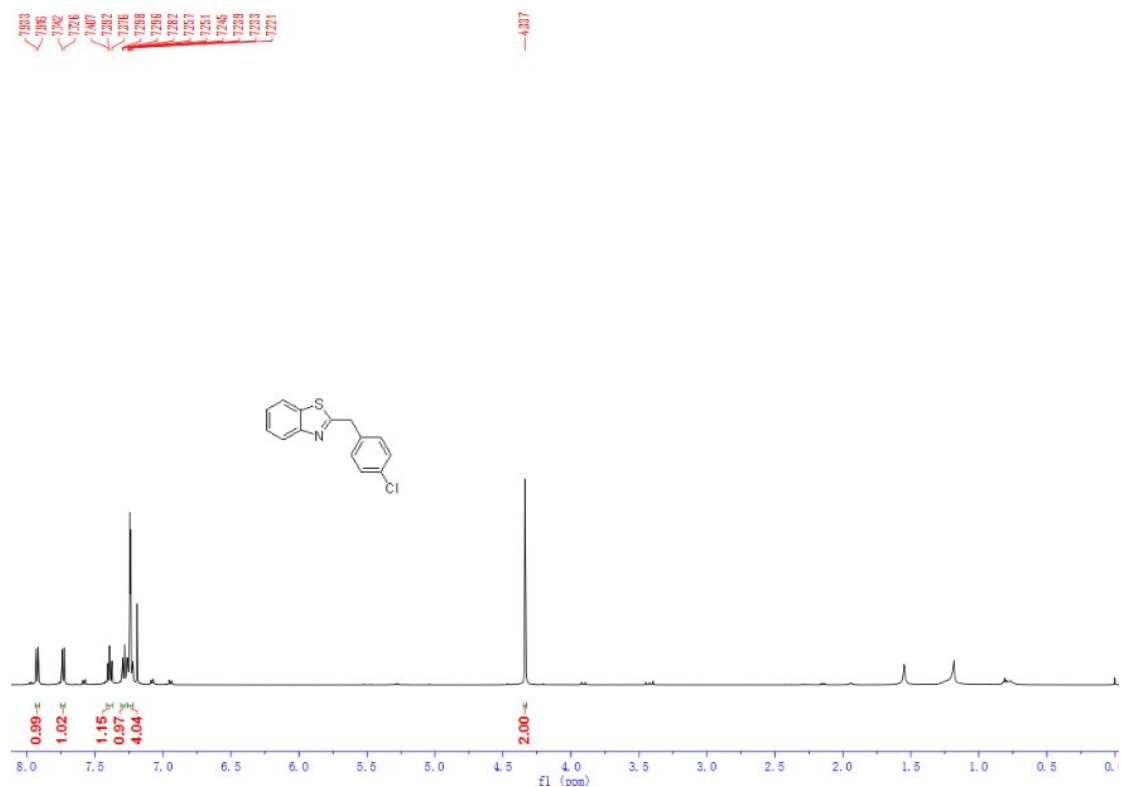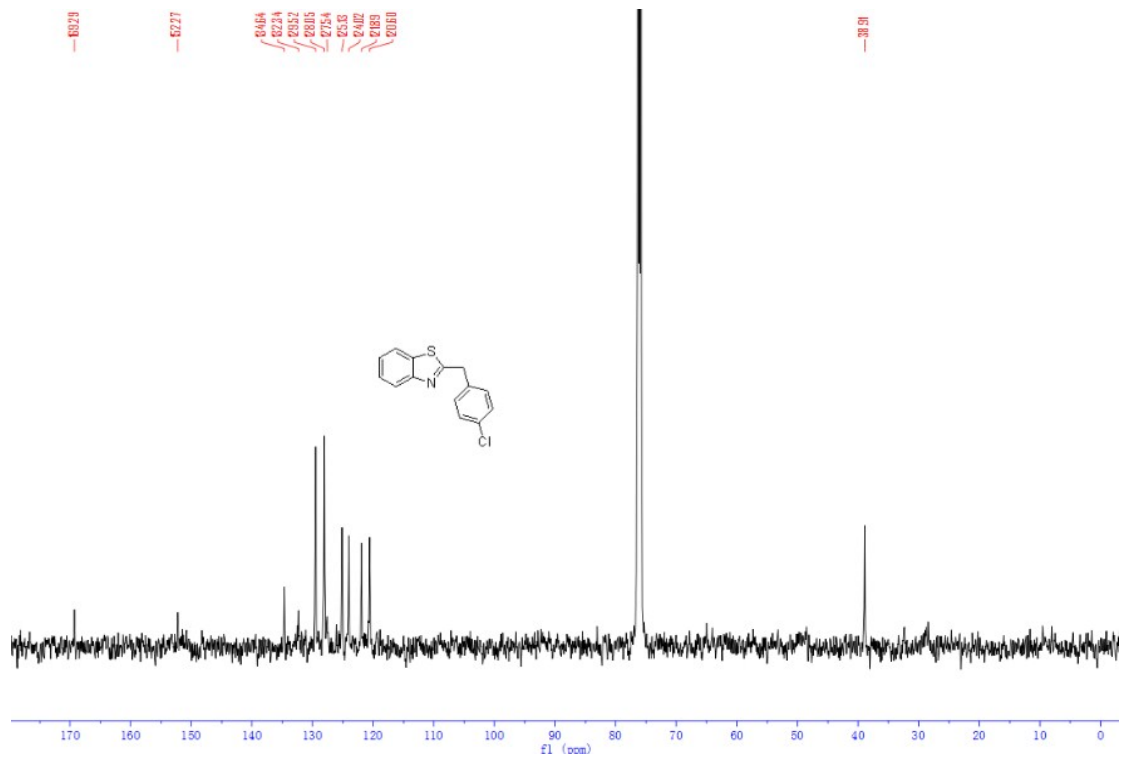

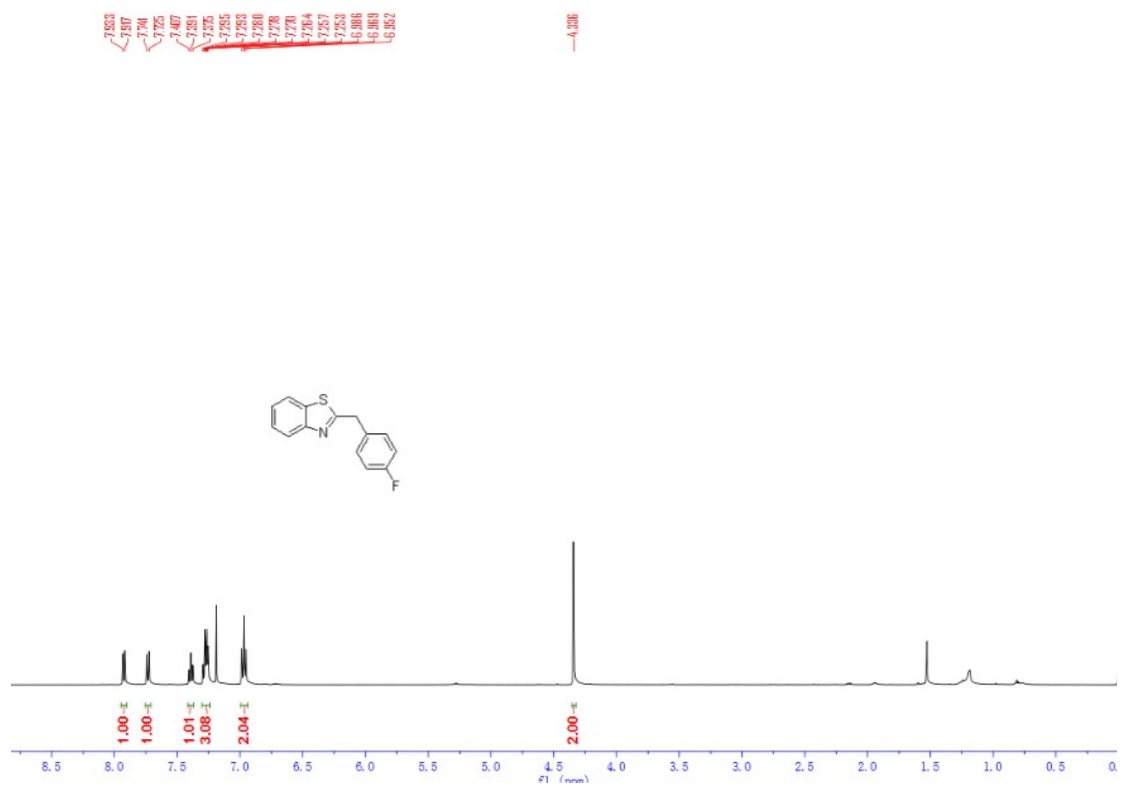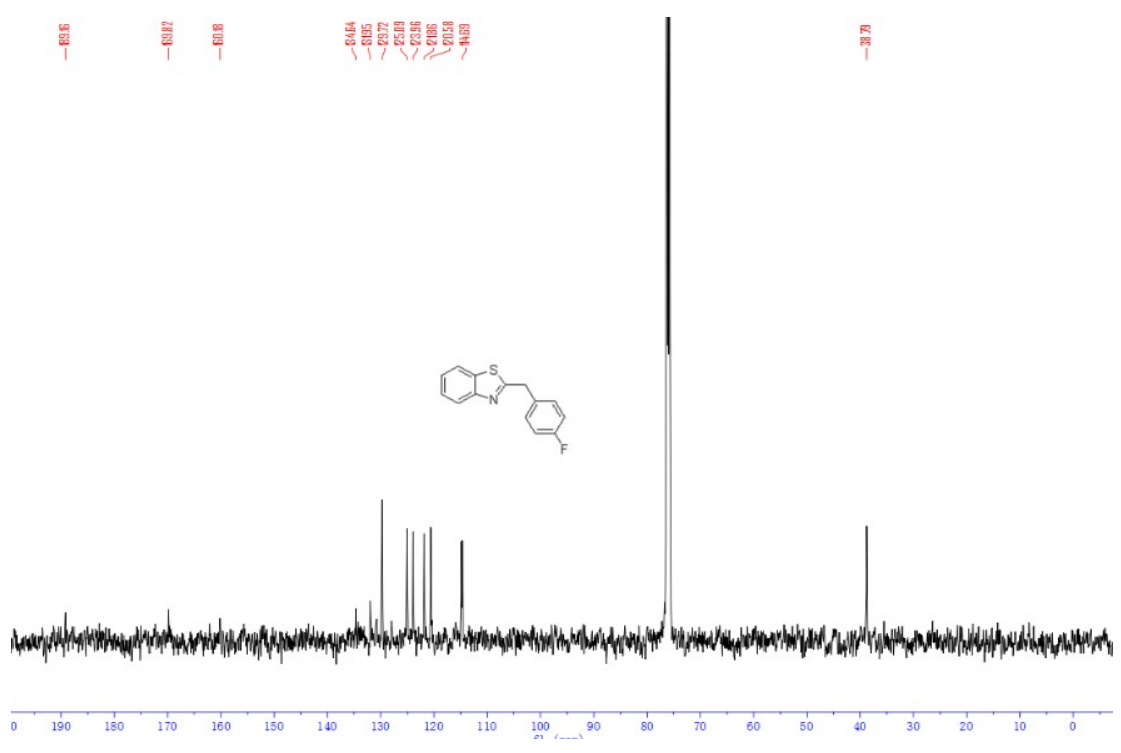

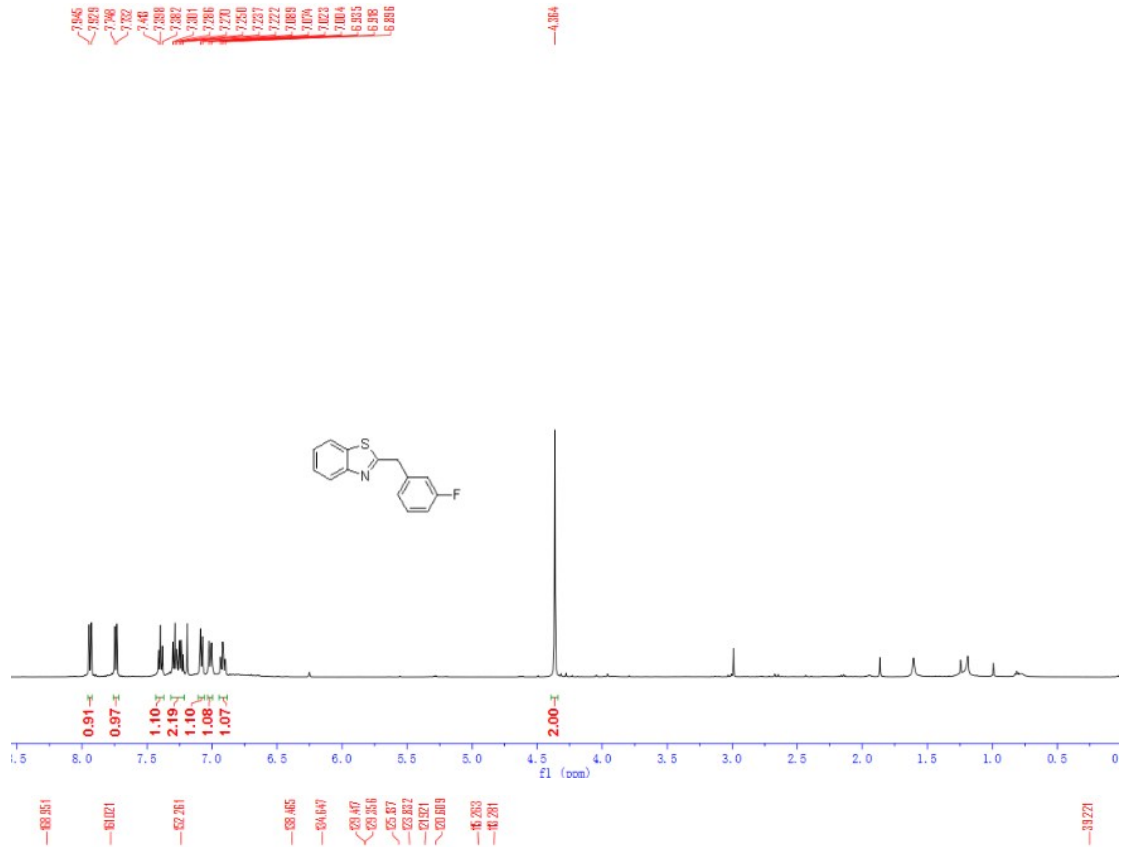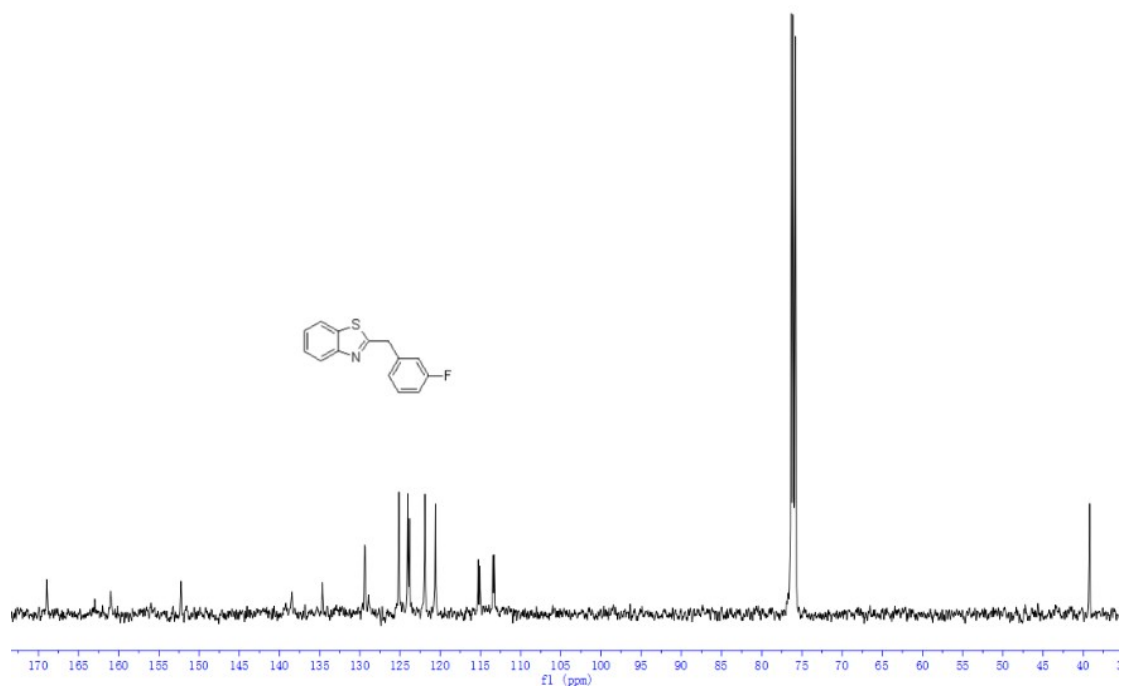

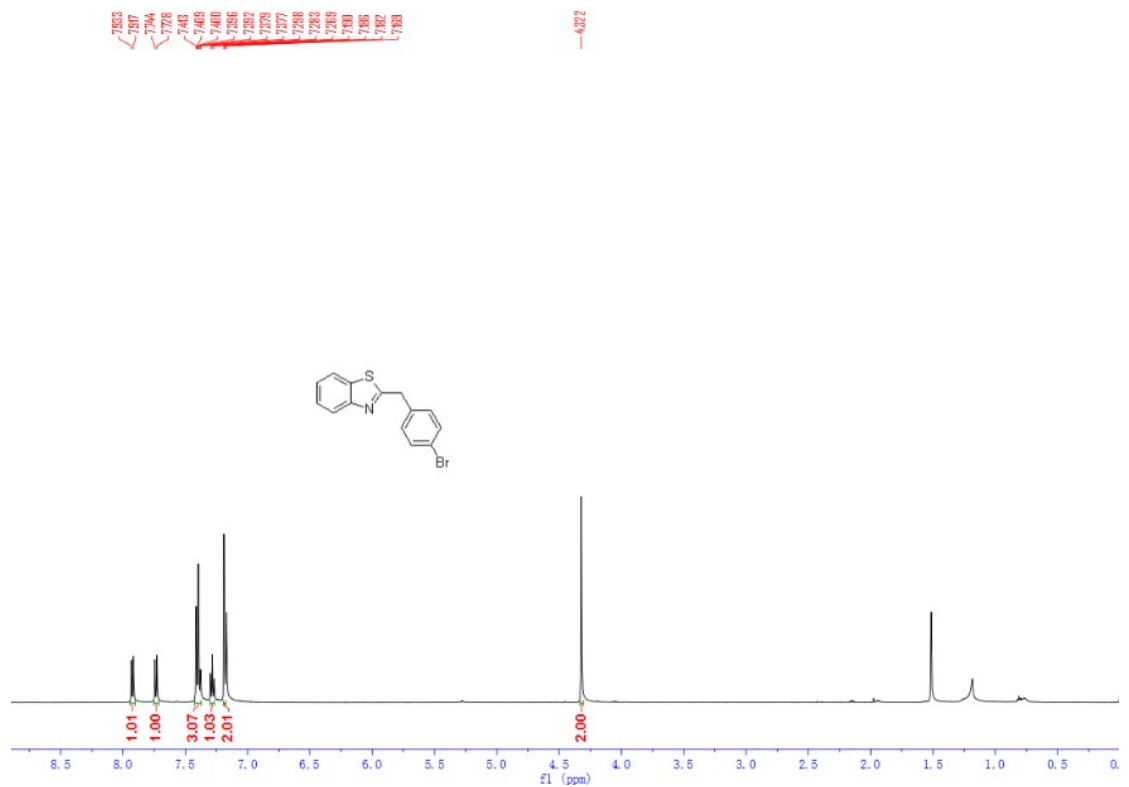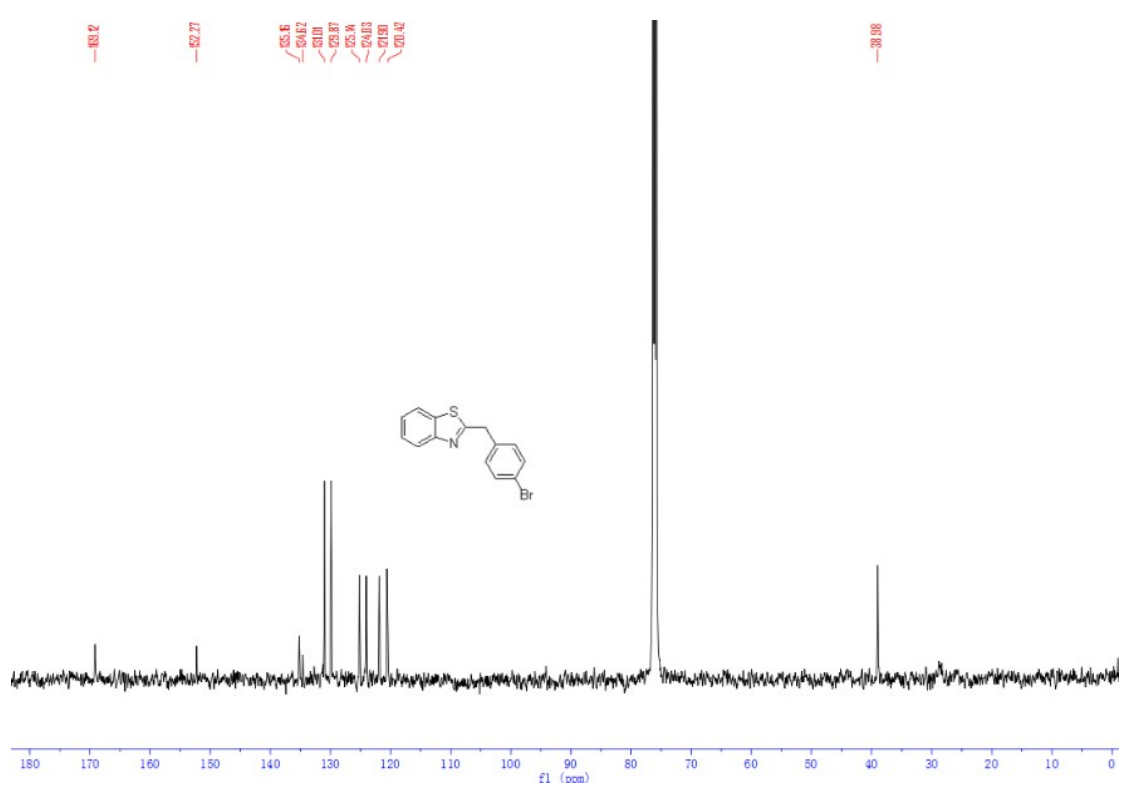

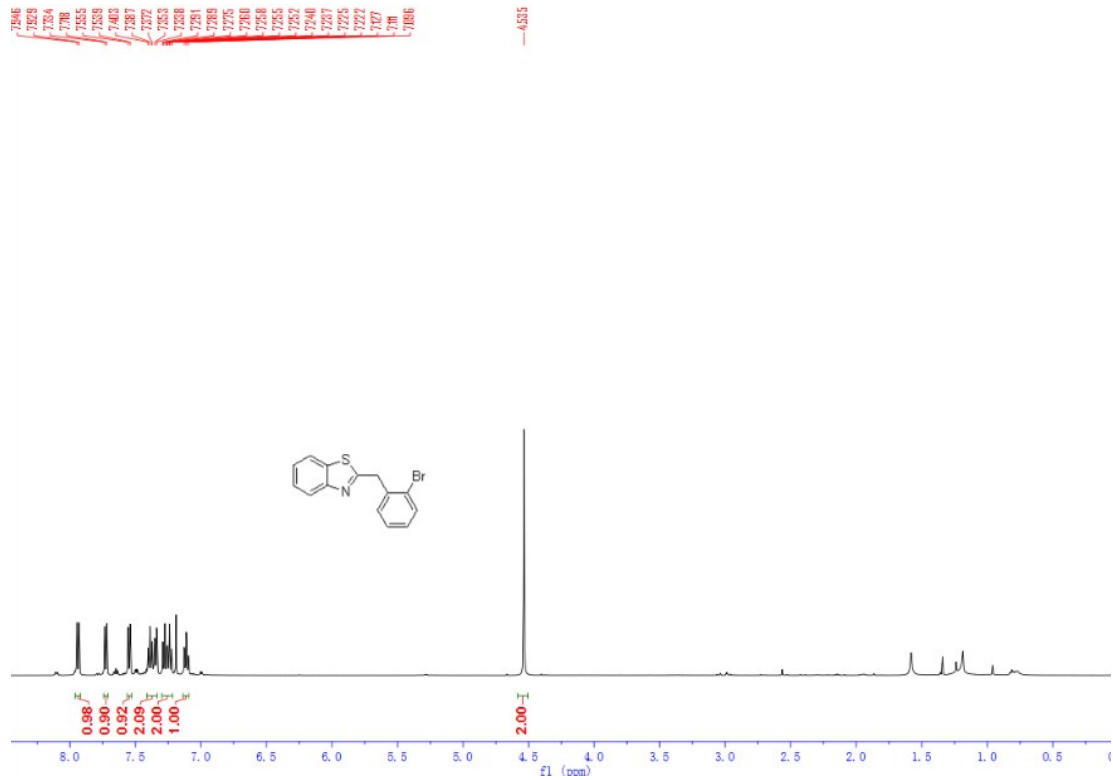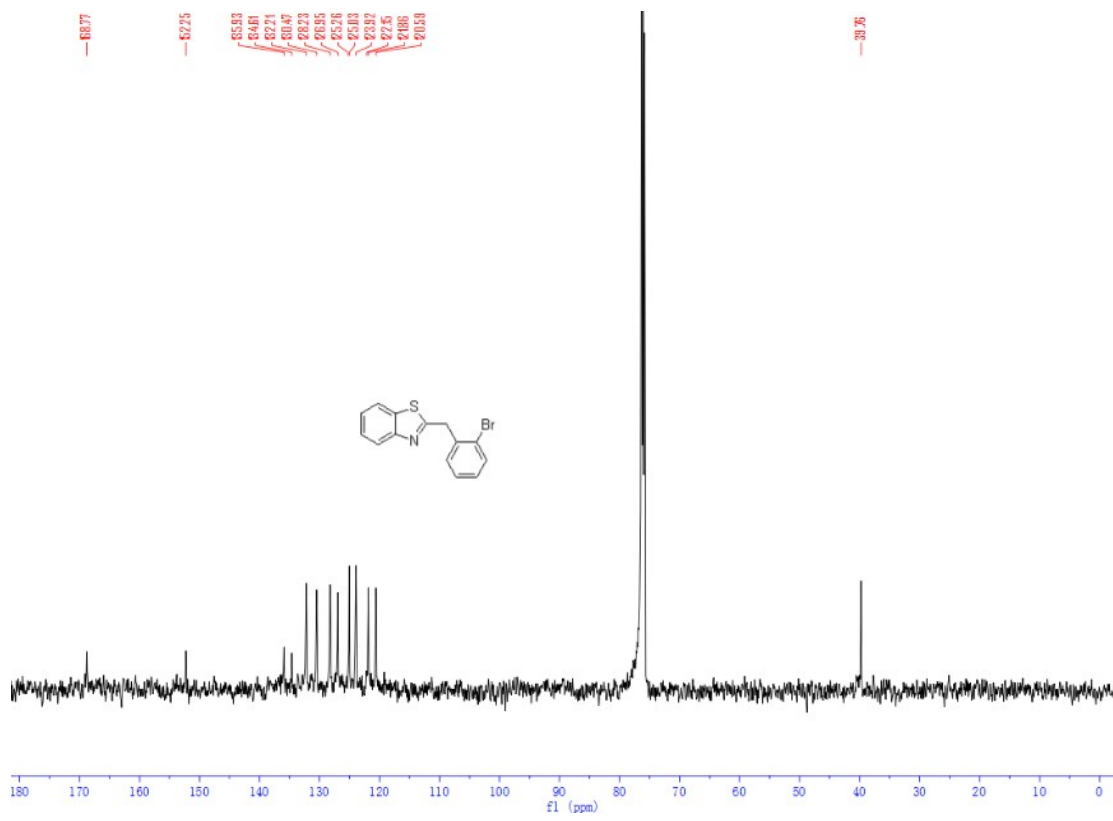

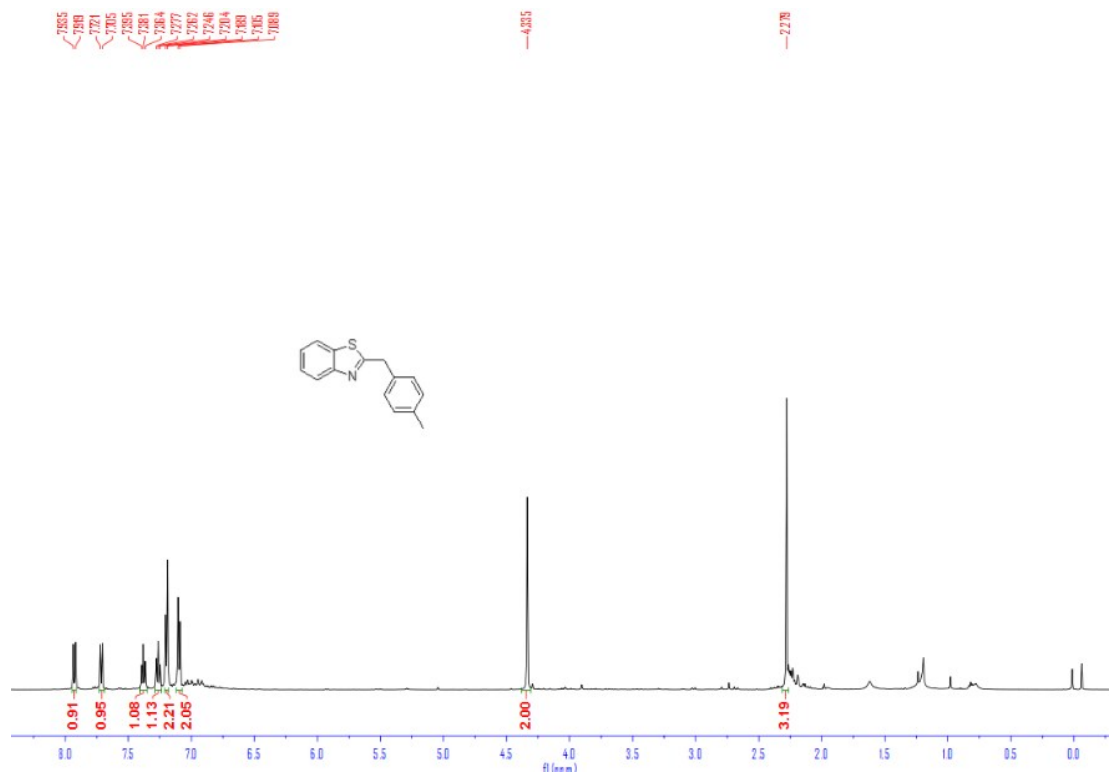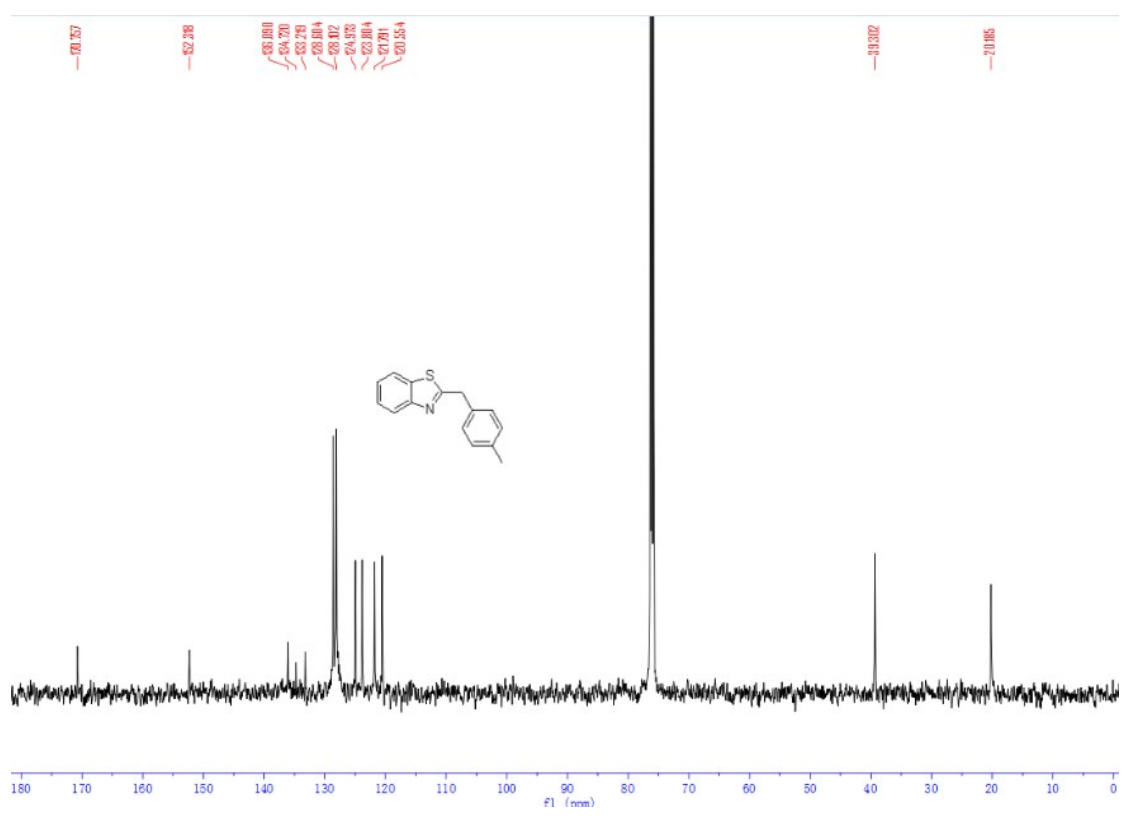

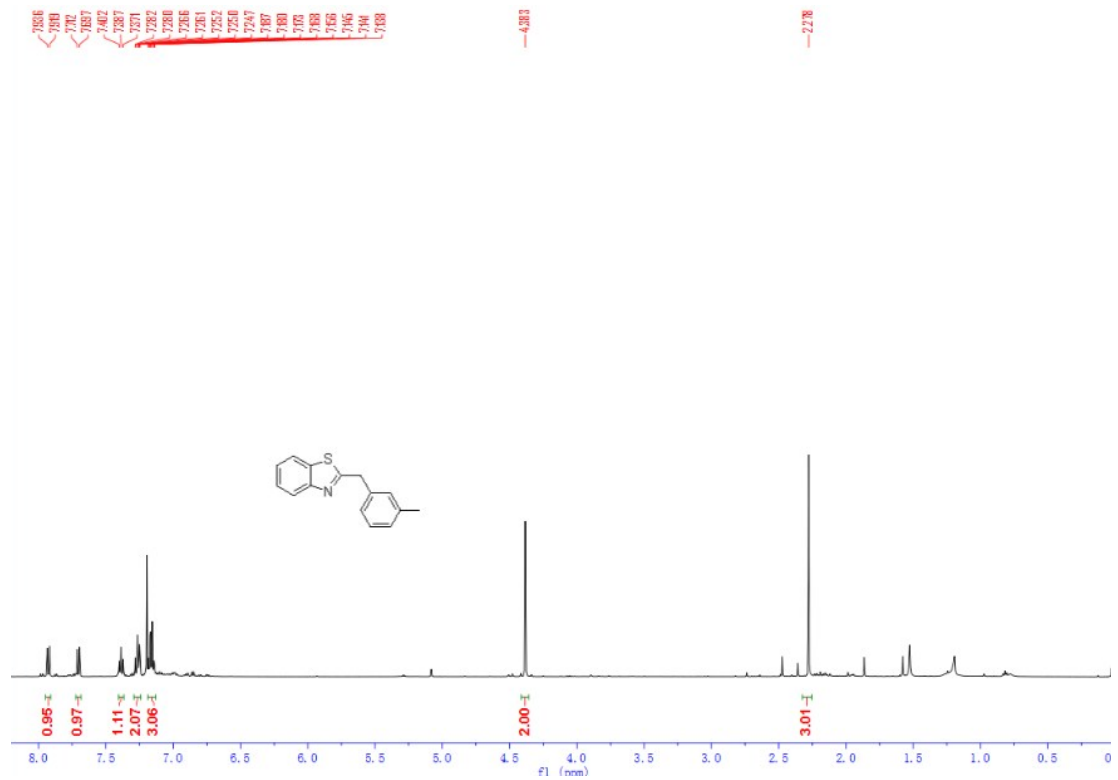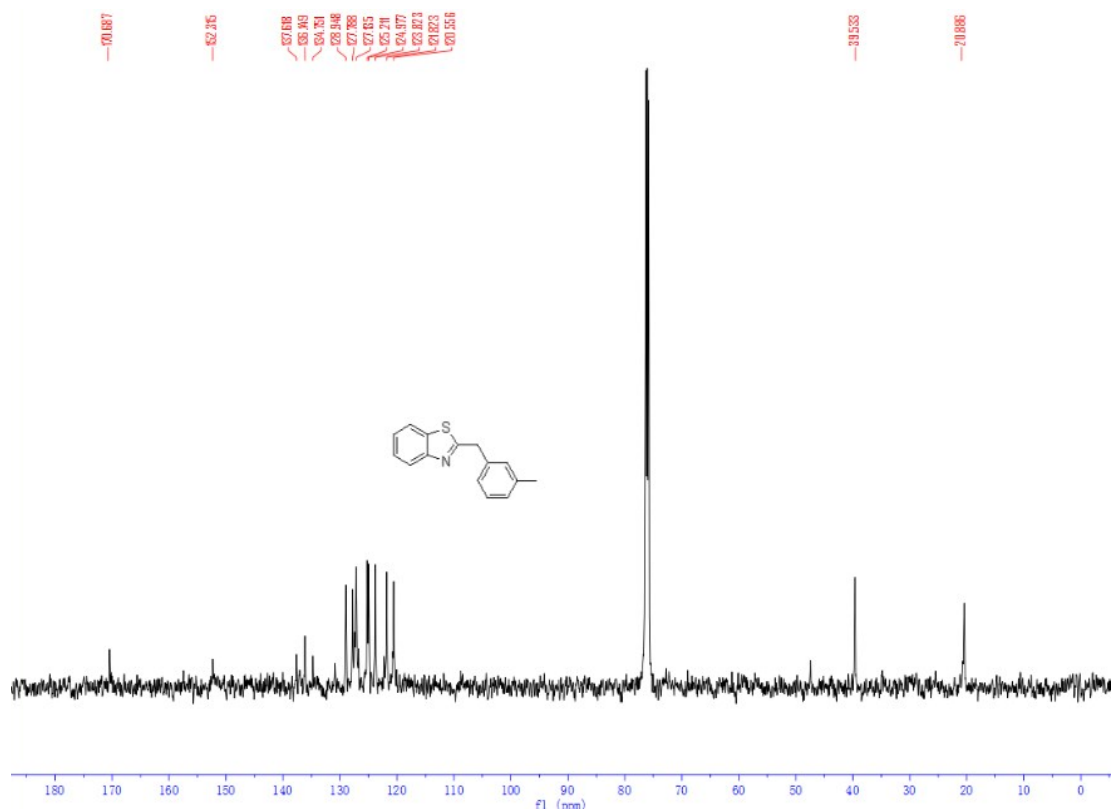

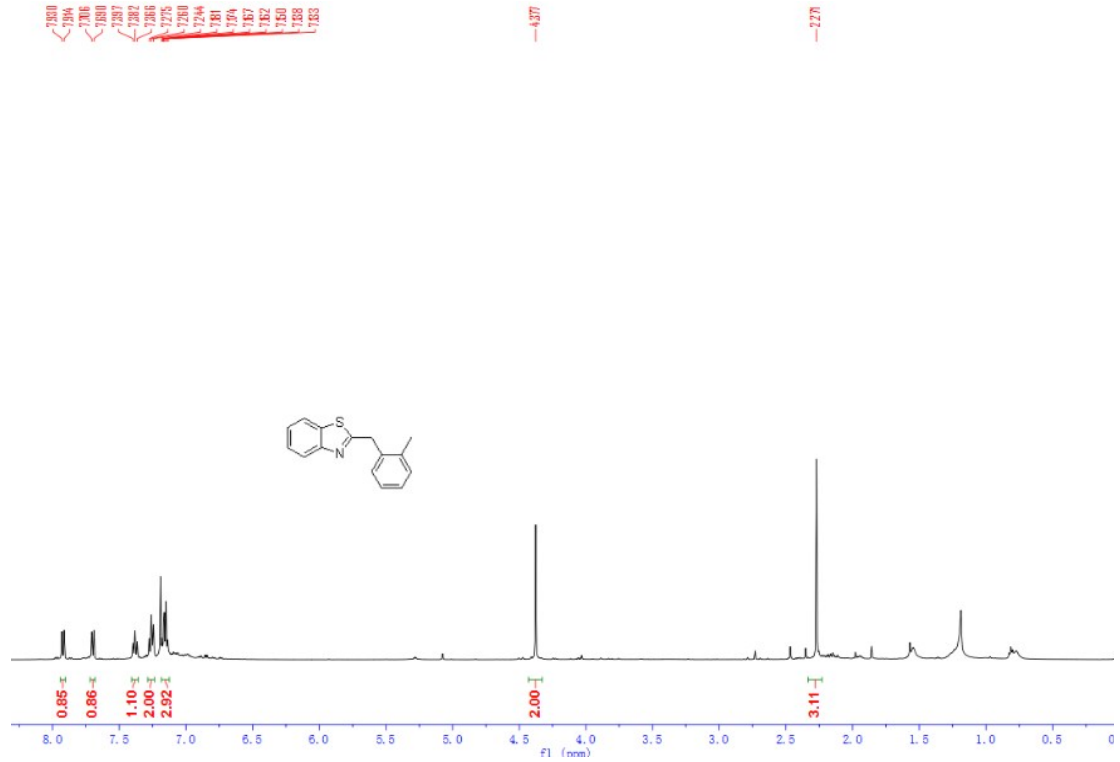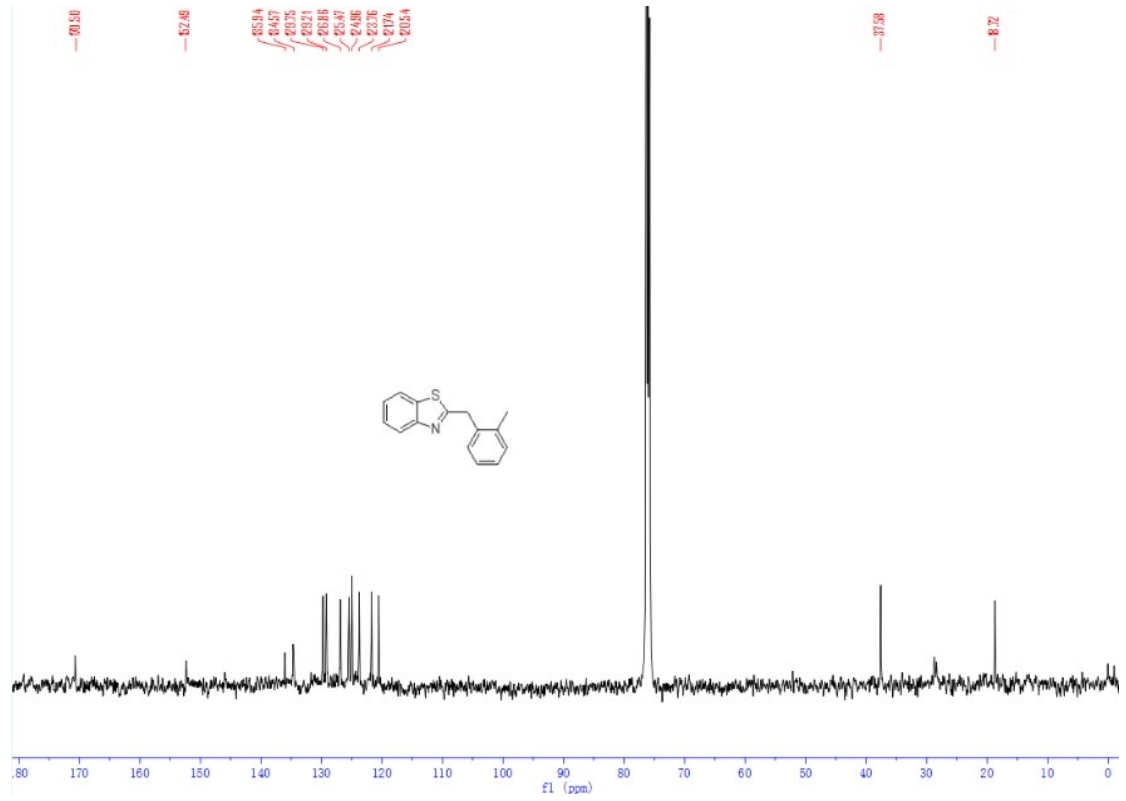



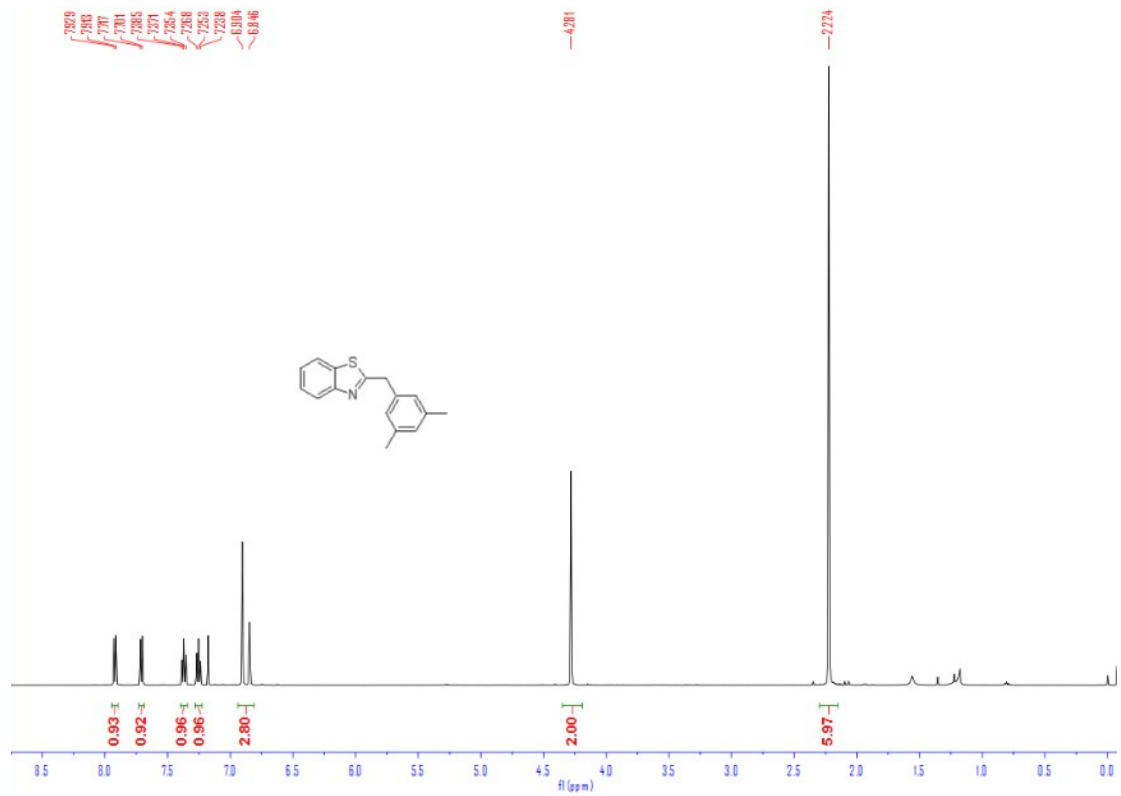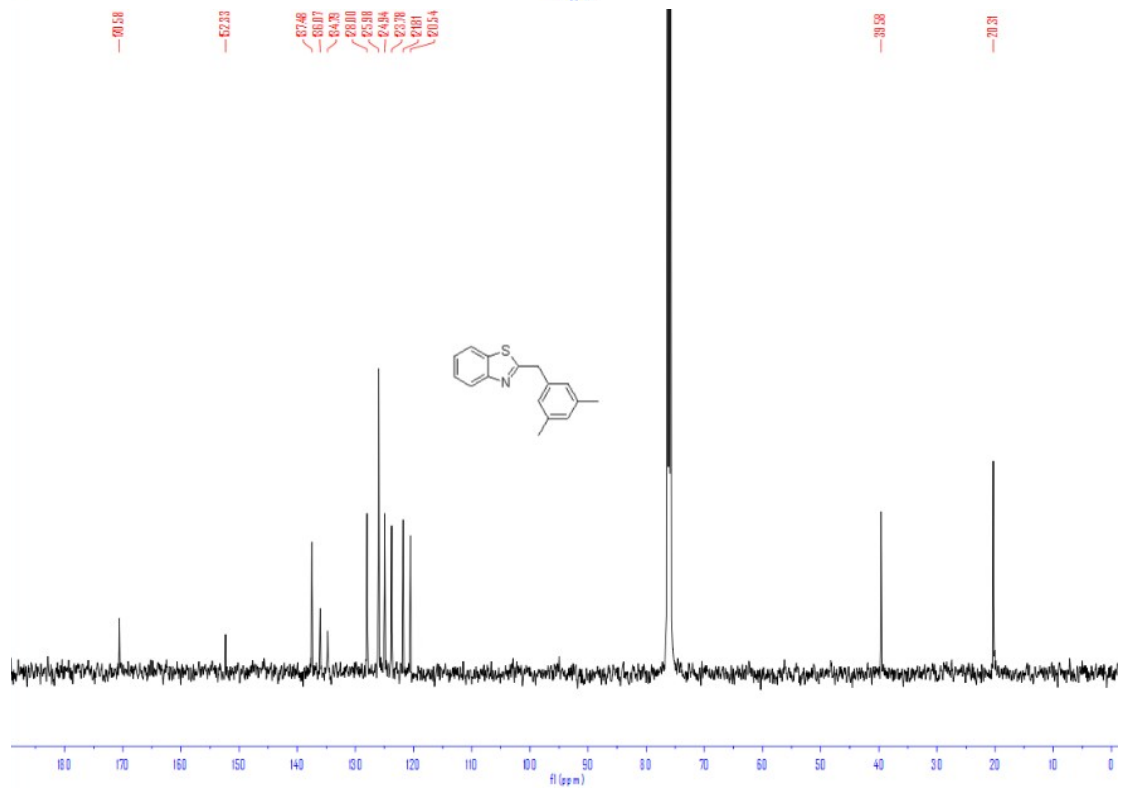

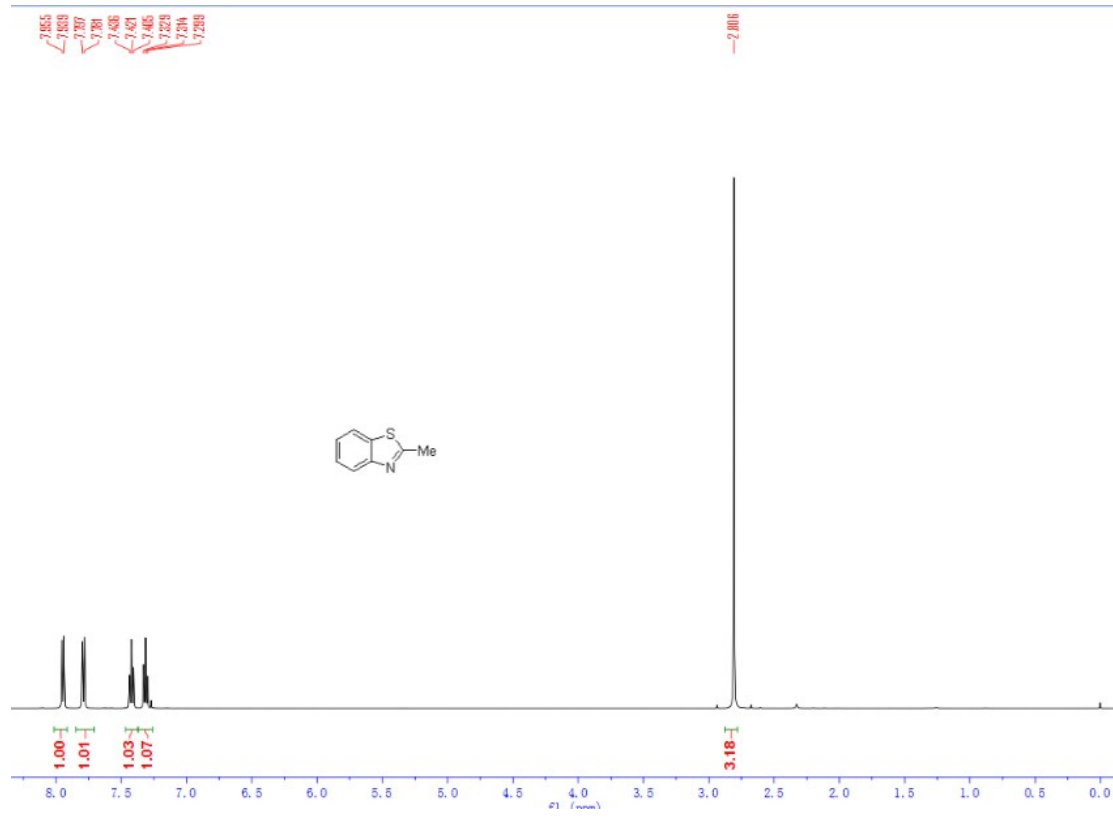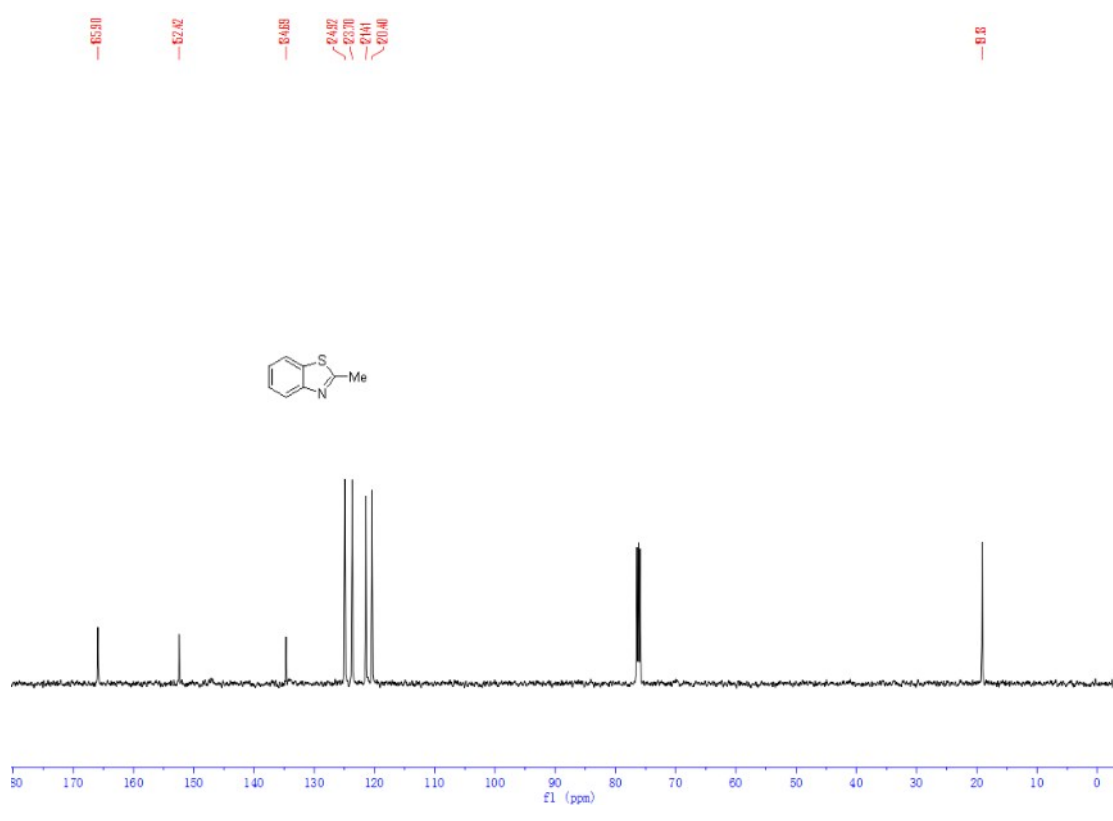

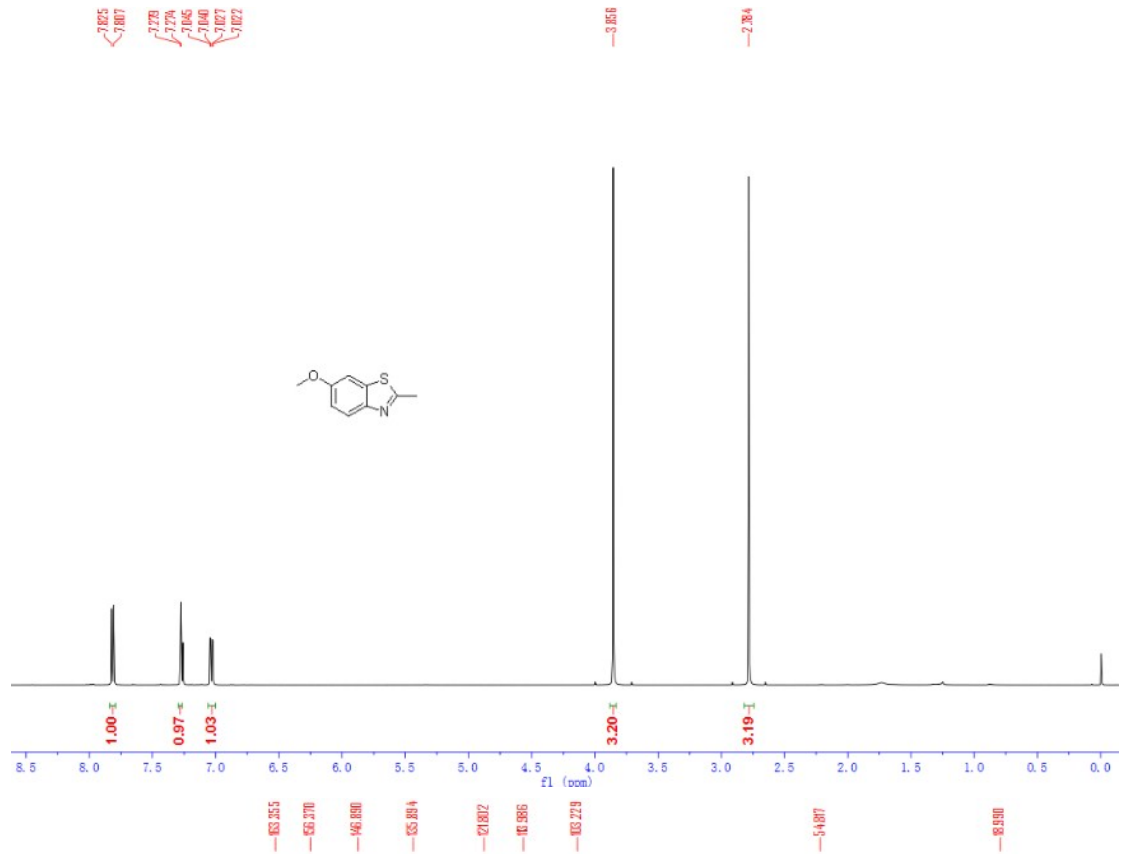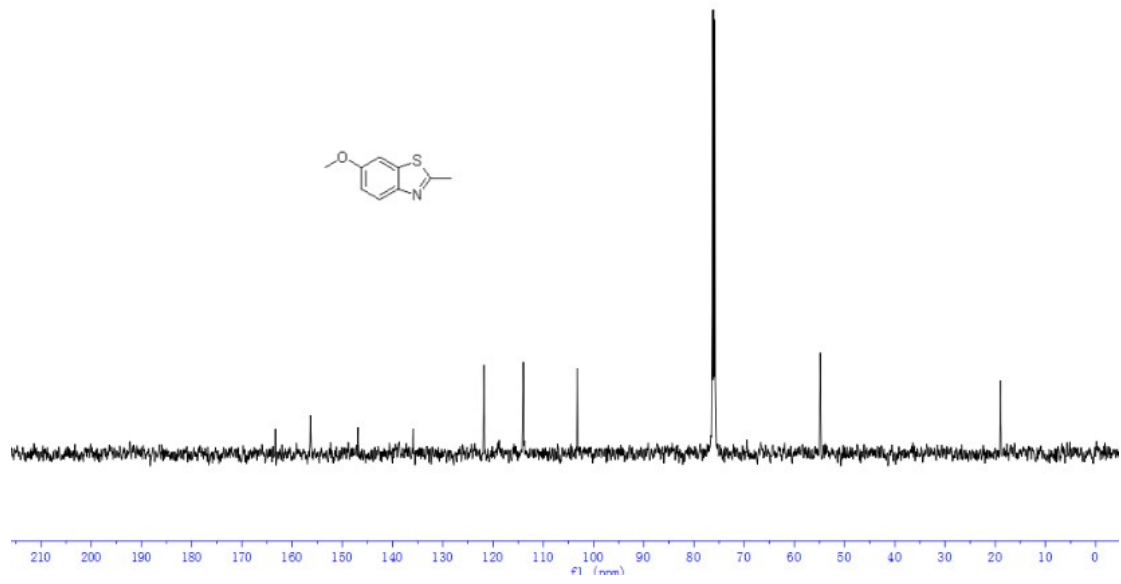

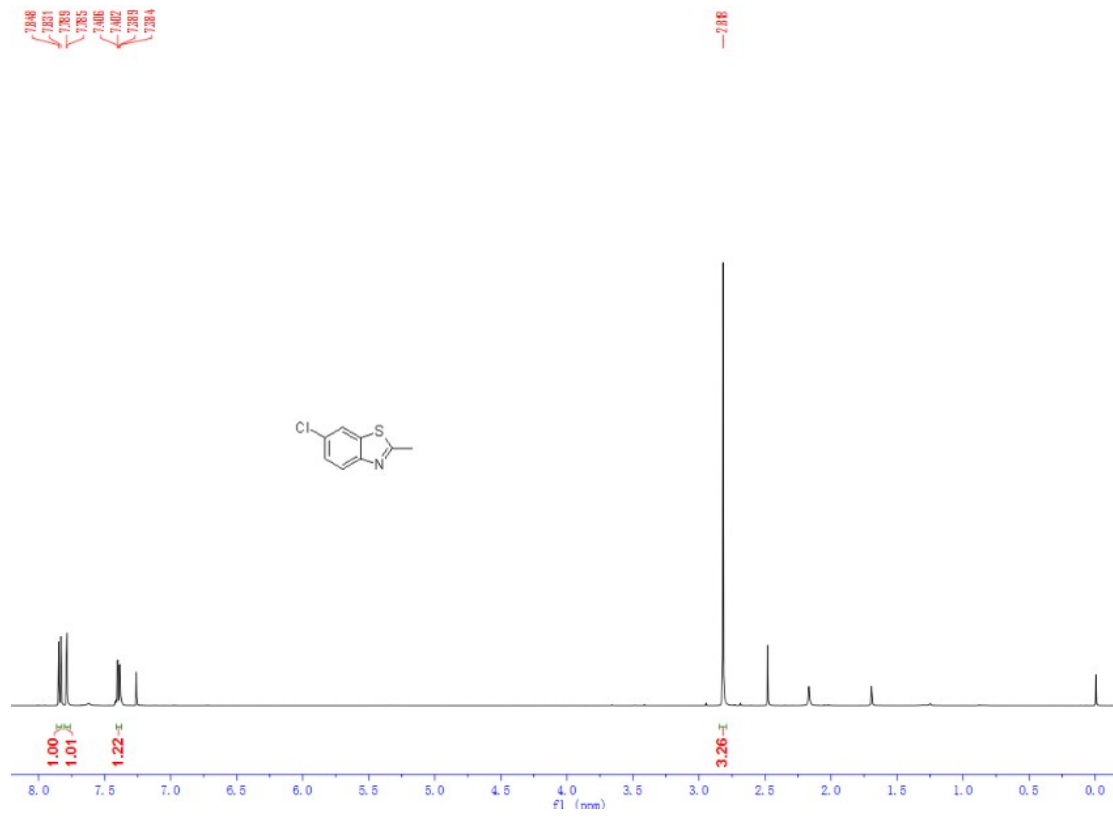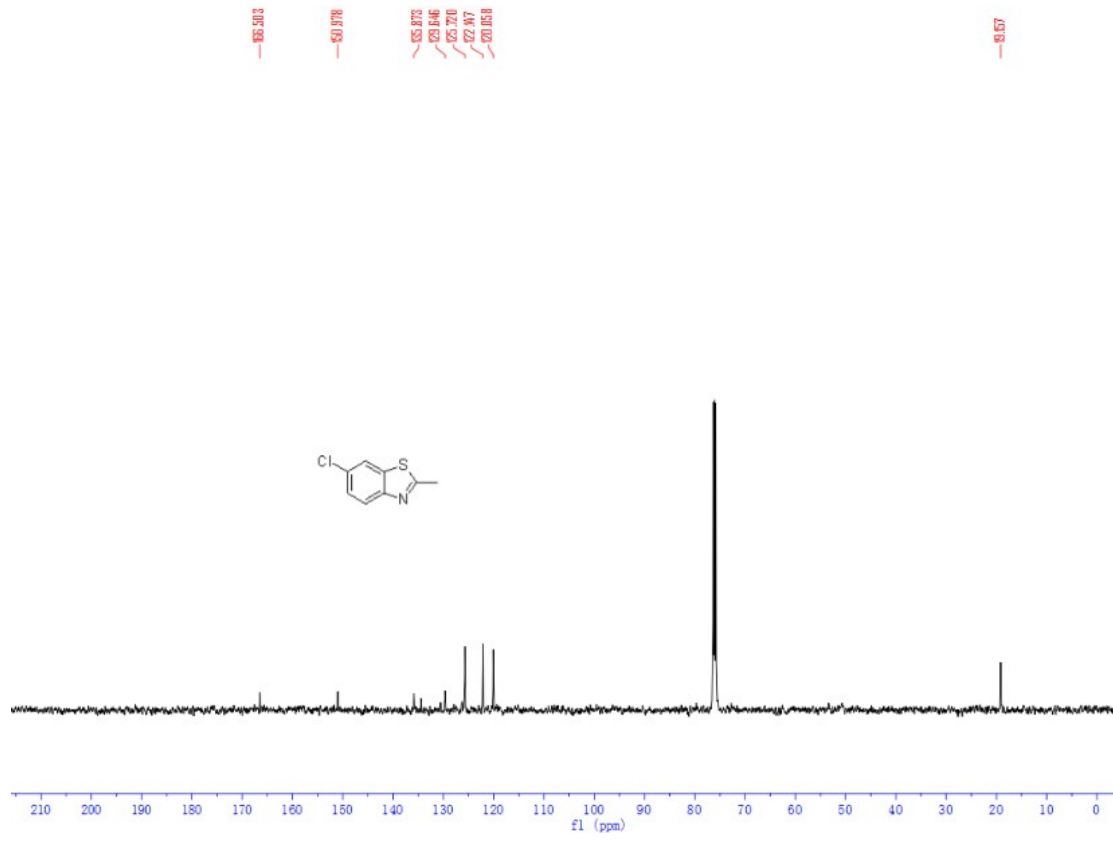

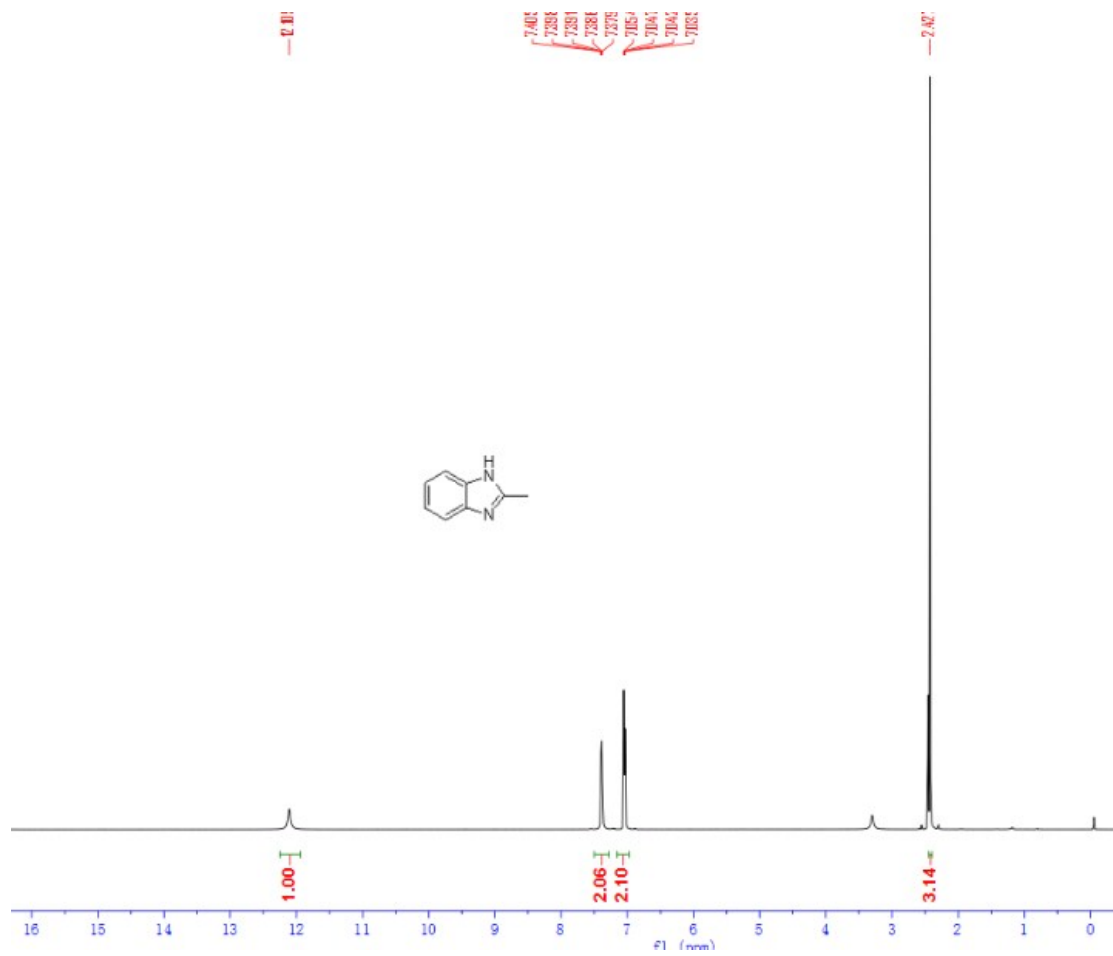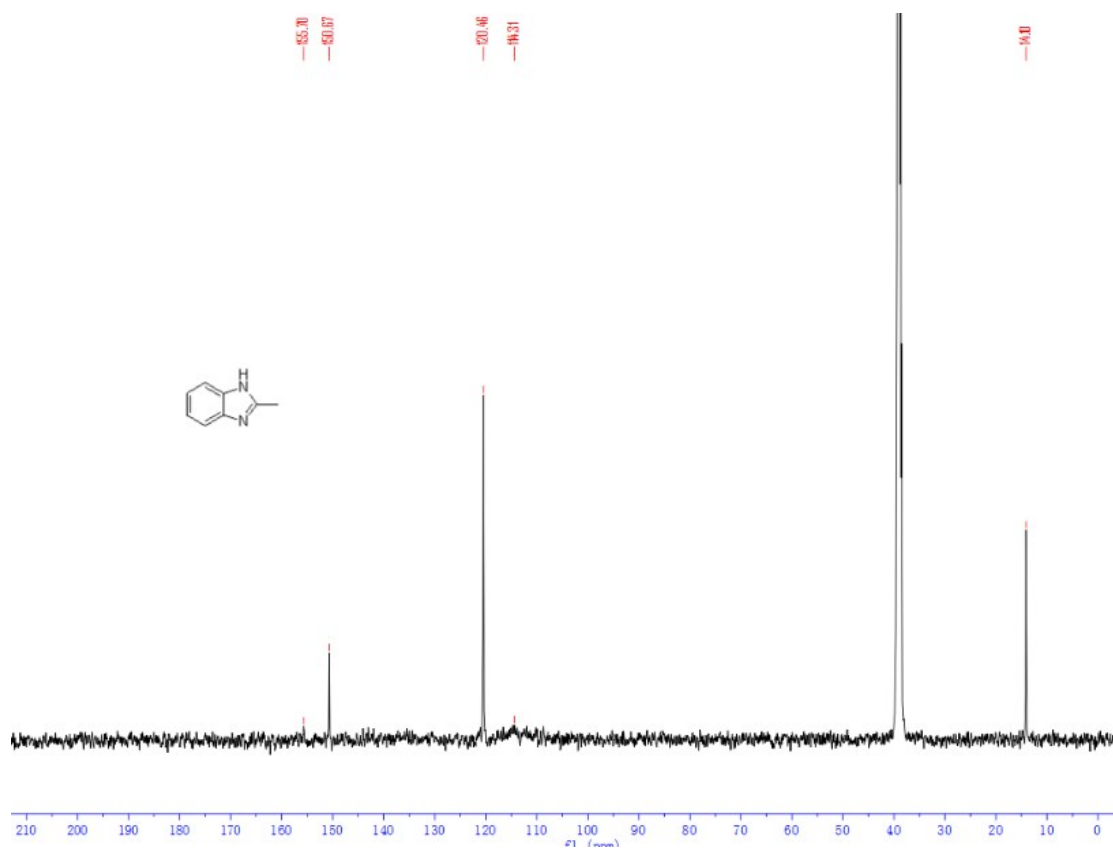

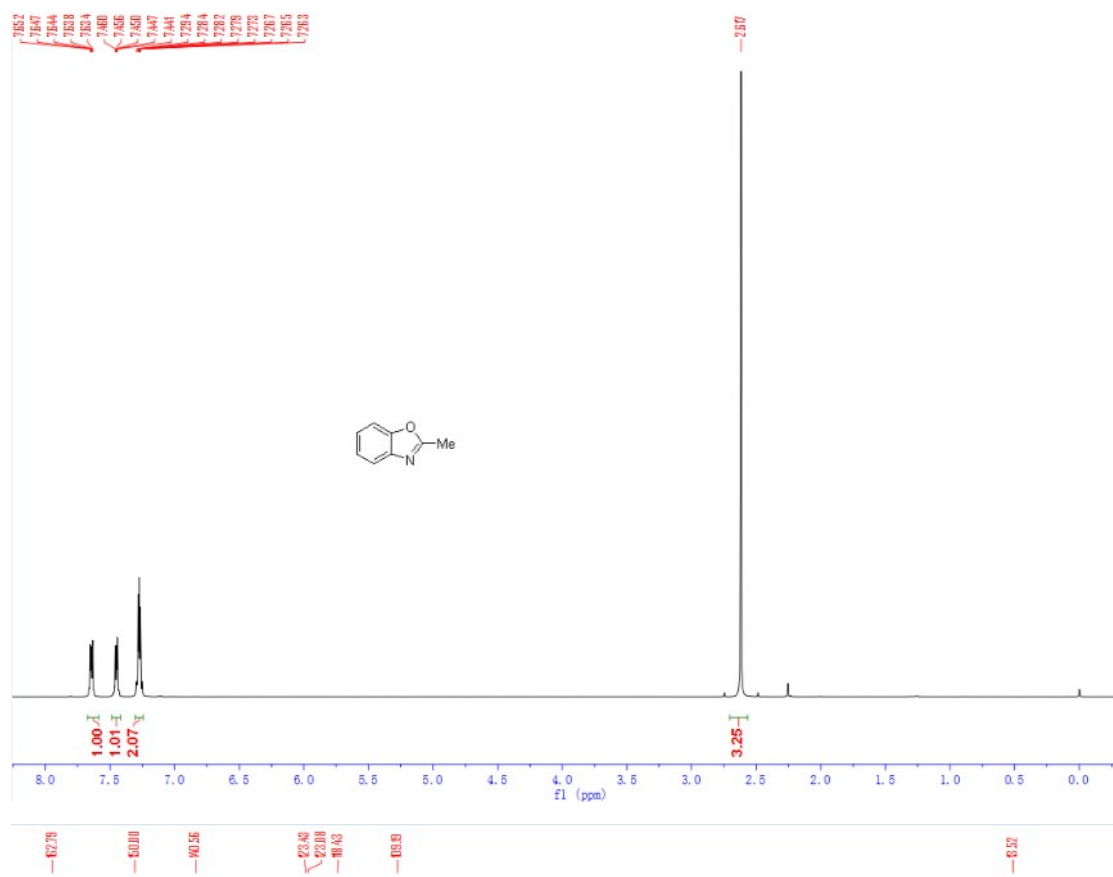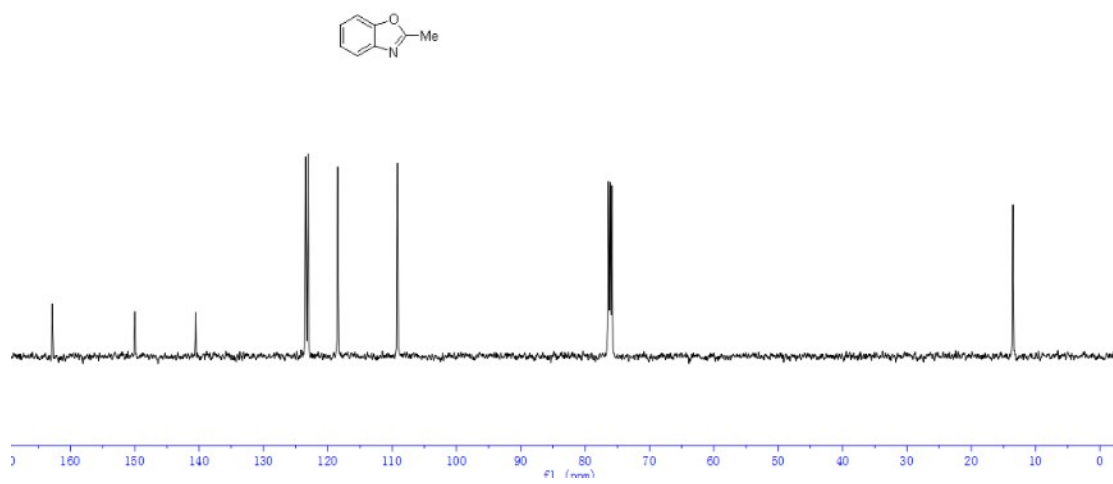

Supplement: c7qo00396j1.pdf [file c7qo00396j1.pdf]
